# Supplementary material for: Integrin alpha11 is an Osteolectin receptor and is required for the maintenance of adult skeletal bone mass
Source: eLife. 2019 Jan 11;8:e42274. doi: 10.7554/eLife.42274 (PMC6349404; doi:10.7554/eLife.42274)
Supplement: Figure 1—source data 1. [file elife-42274-fig1-data1.xlsx]

## Sheet: Figure 1
Figure 1D
	Itga1	Itga2	Itga3	Itga4	Itga5	Itga6	Itga7	Itga8	Itga9	Itga10	Itga11	ItgaD	ItgaE	ItgaL	ItgaM	ItgaV	IIb	ItgaX
RNA-Seq FPKM	51.0602	0.0201646	1.80758	0.111048	3.33726	32.7548	0	1.99461	37.503	9.00099	44.3084	0	0	0.0505563	3.20939	80.8529	0	0
	55.9989	0	0	0.305487	1.60939	39.3172	0	21.6947	6.24316	0.273139	63.784	0	0	0.0507811	0.381169	87.097	0	0
Figure 1E
	Itgb1	Itgb2	Itgb3	Itgb4	Itgb5	Itgb6	Itgb7	Itgb8
RNA-Seq FPKM	175.23	0.0400237	0.218538	0	17.8237	0.114146	0	0
	149.25	0.0737028	9.0518	0	16.7628	0.0865934	0	0
Figure 1F	LepR+ itga1	Endothelial itga1	WBM itga1	LepR+ itga6	Endothelial itga6	WBM itga6	LepR+ itga11	Endothelial itga11	WBM itga11	LepR+ itgaV	Endothelial itgaV	WBM itgaV
	51.0602	40.4342	0.159529	32.7548	87.5282	2.47208	44.3084	0.104747	0.086044	80.8529	27.0897	3.30758
RNA-Seq FPKM	55.9989	49.6682	6.01493	39.3172	27.9928	18.513	63.784	0.204955	0.020935	87.097	63.948	1.48272
Figure 1G (Statistical significance assessed using one-way repeated measures ANOVA followed by the Dunnett's multiple comparisons test）
	WBM	Endothelial	LepR+	Osteoblasts	CMP	GMP	MEP	CLP	CD3+	Erythroid	Myeloid	LSKs	MPPs	HSCs	B220+	Pro-B	Pre-pro-B
Relative fold change:	0.445747	2.74023	151011	167558	0.537485	1.26076	1.08998	0.164288	0.415897	0.929352	1.22629	2.09115	0.541224	4.01193	0.349726	2.25683	4.01193
	2.24124	1.30522	183357	57222.6	1.71036	0.427589	1.79539	0.147042	1.56298	1.95111	1.6521	1.46845	0.657151	1.22629	4.51366	1.74629	0.374827
	0.313014	4.45152	134225	483882	1.75844	2.48681	0.33548	1.96468	1.46845	0.33548	0.43961	1.30522	0.996055	0.501491	1.56298	1.29621	1.37965
Figure 1I
OD450	Integrin concentrations (nM)	a11b1			a10b1			aVb1			a4b1			a9b1			aVb3			IIbb3			Mb2
	0.001	0.04	0.07	0.05	0.05	0.08	0.1	0.05	0.04	0.05	0.06	0.06	0.04	0.05	0.06	0.05	0.05	0.03	0.05	0.04	0.05	0.01	0.06	0.06	0.06
	0.01	0.22	0.28	0.27	0.23	0.33	0.32	0.08	0.02	0.09	0.12	0.05	0.06	0.05	0.14	0.07	0.05	0.05	0.02	0.03	0.05	0.05	0.19	0.01	0.06
	0.1	0.55	0.66	0.57	0.67	0.61	0.41	0.13	0.13	0.23	0.2	0.08	0.05	0.02	0.12	0.13	0.05	0.06	0.1	0.02	0.05	0.02	0.05	0.02	0.05
	1	1.12	1.18	1.03	1.32	1.02	1.11	0.24	0.11	0.32	0.08	0.12	0.12	0.05	0.09	0.12	0.11	0.12	0.2	0.02	0.02	0.03	0.02	0.05	0.01
	10	1.54	1.51	1.48	1.62	1.32	1.48	0.23	0.22	0.23	0.17	0.32	0.03	0.12	0.13	0.18	0.21	0.22	0.23	0.05	0.05	0.05	0.05	0.05	0.05
	100	1.55	1.65	1.61	1.59	1.53	1.59	0.32	0.33	0.23	0.12	0.22	0.23	0.13	0.14	0.14	0.42	0.37	0.24	0.05	0.04	0.06	0.03	0.06	0.04
Figure 1J	ligand concentrations (nM)	BSA			rhCollagen			rhOsteolectin
OD450	0.001	0.04	0.04	0.03	0.04	0.05	0.07	0.05	0.04	0.05
	0.01	0.03	0.02	0.05	0.15	0.23	0.33	0.15	0.33	0.27
	0.1	0.04	0.05	0.04	0.67	0.64	0.46	0.43	0.45	0.35
	1	0.05	0.03	0.02	0.96	1.05	1.22	0.87	1.06	0.87
	10	0.06	0.05	0.08	1.73	1.42	1.53	1.08	1.12	1.25
	100	0.09	0.06	0.09	1.88	1.53	1.66	1.14	1.32	1.31
Figure 1K (Statistical significance assessed using two-way repeated measures ANOVA followed by the Dunnett's multiple comparisons test）	MC3T3-E1 + PBS	MC3T3-E1 + rhOsteolectin 30ug/ml	MC3T3-E1 + rhCollagen 30ug/ml	MC3T3-E1 + rhOsteolectin 100ug/ml	MC3T3-E1 + rhCollagen 100ug/ml	hMSC#1 + PBS	hBMSC#1 + rhOsteolectin 30ug/ml	hBMSC#1 + rhCollagen 30ug/ml	hBMSC#1 + rhOsteolectin 100ug/ml	hMSC#1 + rhCollagen 100ug/ml	hBMSC#2 + PBS	hBMSC#2 + rhOsteolectin 30ug/ml	hBMSC#2 + rhCollagen 30ug/ml	hBMSC#2 + rhOsteolectin 100ug/ml	hBMSC#2 + rhCollagen 100ug/ml
OD562	0.921	1.632	0.904	1.943	1.148	0.751	1.279	0.742	1.422	0.842	0.504	1.016	0.502	1.327	0.821
	0.908	1.64	0.915	1.852	0.721	0.74	1.173	0.667	1.473	0.648	0.58	0.923	0.573	1.471	0.638
	0.914	1.717	0.927	2.053	0.727	0.755	1.291	0.628	1.363	0.647	0.521	0.807	0.52	1.377	0.326
Figure 1L	Integrin concentrations (nM)	BSA			rhOsteolectin			rhOsteolectin + RGDS
OD450	0.001	0.02	0.03	0.04	0.02	0.04	0.03	0.04	0.03	0.1
	0.01	0.03	0.04	0.05	0.21	0.22	0.21	0.05	0.04	0.03
	0.1	0.02	0.04	0.03	0.52	0.51	0.61	0.11	0.21	0.25
	1	0.12	0.11	0.17	0.91	0.92	0.93	0.25	0.28	0.35
	10	0.12	0.08	0.11	1.12	1.15	1.01	0.32	0.33	0.37
	100	0.14	0.13	0.11	1.19	1.12	1.18	0.23	0.45	0.37
Figure 1M (Statistical significance assessed using two-way repeated measures ANOVA followed by the Tukey's multiple comparisons test）	MC3T3-E1 + PBS	MC3T3-E1 + rhOln	MC3T3-E1 + RGDS	MC3T3-E1 + rhOln + RGDS	hBMSC #1 + PBS	hBMSC #1 + rOln	hBMSC #1 + RGDS	hBMSC #1 + rhOln + RGDS	hBMSC #2 + PBS	hBMSC #2 + rOln	hBMSC #2 + RGDS	hBMSC #2 + rhOln + RGDS
	1.123	1.821	0.821	0.921	0.732	1.012	0.54	0.421	0.721	1.328	0.633	0.537
	1.175	1.933	0.857	0.84	0.86	1.155	0.375	0.239	0.757	1.238	0.472	0.682
	1.54	2.2	1.127	1.132	0.744	1.158	0.33	0.281	0.88	1.116	0.57	0.435
	1.574	2.17	1.12	1.07	0.758	1.411	0.385	0.22	0.825	1.5	0.446	0.32
	1.372	1.903	1.092	1.02	0.662	1.468	0.21	0.31	0.858	1.383	0.471	0.319

## Sheet: Figure 1 Statistics
Figure 1G (Statistical significance assessed using one-way repeated measures ANOVA followed by the Dunnett's multiple comparisons test）
Dunnett's multiple comparisons test	Mean Diff.	95.00% CI of diff.	Significant?	Summary	Adjusted P Value
WBM vs. Endothelial	-1.89	-13.6 to 9.82	No	ns	0.7858
WBM vs. LepR+	-17.8	-24.13 to -11.47	Yes	**	0.0065
WBM vs. Osteoblasts	-17.91	-32.64 to -3.173	Yes	*	0.0342
WBM vs. CMP	-0.79	-8.182 to 6.602	No	ns	0.9453
WBM vs. GMP	-0.7	-14.31 to 12.91	No	ns	0.9986
WBM vs. MEP	-0.3567	-4.448 to 3.735	No	ns	0.9792
WBM vs. CLP	0.9067	-15.37 to 17.18	No	ns	0.9984
WBM vs. CD3+	-0.5367	-7.795 to 6.721	No	ns	0.9921
WBM vs. Erythroid	-0.32	-3.545 to 2.905	No	ns	0.9606
WBM vs. Myeloid	-0.5033	-5.158 to 4.151	No	ns	0.9425
WBM vs. LSKs	-1.227	-9.031 to 6.577	No	ns	0.7999
WBM vs. MPPs	-0.06	-8.539 to 8.419	No	ns	0.9999
WBM vs. HSCs	-0.9933	-10.98 to 8.992	No	ns	0.9601
WBM vs. B220+	-0.9933	-7.534 to 5.548	No	ns	0.8173
WBM vs. Pro-B	-1.343	-8.605 to 5.919	No	ns	0.7078
WBM vs. Pre-pro-B	-0.91	-15.93 to 14.11	No	ns	0.9968
Figure 1K (Statistical significance assessed using two-way repeated measures ANOVA followed by the Dunnett's multiple comparisons test）
Dunnett's multiple comparisons test	Mean Diff.	95.00% CI of diff.	Significant?	Summary	Adjusted P Value
MC3T3-E1
PBS vs. 30_rhOln	-0.7487	-0.9711 to -0.5262	Yes	***	0.0001
PBS vs. 30_rhCol1A	-0.001	-0.2234 to 0.2214	No	ns	0.9999
PBS vs. 100_rhOln	-1.035	-1.257 to -0.8126	Yes	***	0.0001
PBS vs. 100_rhCol1A	0.049	-0.1734 to 0.2714	No	ns	0.9411
hBMSC#1
PBS vs. 30_rhOln	-0.499	-0.7214 to -0.2766	Yes	***	0.0001
PBS vs. 30_rhCol1A	0.06967	-0.1528 to 0.2921	No	ns	0.8284
PBS vs. 100_rhOln	-0.6707	-0.8931 to -0.4482	Yes	***	0.0001
PBS vs. 100_rhCol1A	0.03633	-0.1861 to 0.2588	No	ns	0.9791
hBMSC#2
PBS vs. 30_rhOln	-0.3803	-0.6028 to -0.1579	Yes	***	0.0006
PBS vs. 30_rhCol1A	0.003333	-0.2191 to 0.2258	No	ns	0.9999
PBS vs. 100_rhOln	-0.8567	-1.079 to -0.6342	Yes	***	0.0001
PBS vs. 100_rhCol1A	-0.06	-0.2824 to 0.1624	No	ns	0.8885
Figure 1M (Statistical significance assessed using two-way repeated measures ANOVA followed by the Tukey's multiple comparisons test)
Tukey's multiple comparisons test	Mean Diff.	95.00% CI of diff.	Significant?	Summary	Adjusted P Value
MC3T3-E1
PBS vs. rhOln	-0.6486	-0.8092 to -0.4880	Yes	***	0.0003
PBS vs. RGDS	0.3534	0.2155 to 0.4913	Yes	**	0.0017
RGDS vs. rhOln+RGDS	0.0068	-0.1145 to 0.1281	No	ns	0.9952
hBMSC #1
PBS vs. rhOln	-0.4896	-0.9110 to -0.06819	Yes	*	0.0305
PBS vs. RGDS	0.3832	0.1742 to 0.5922	Yes	**	0.006
RGDS vs. rhOln+RGDS	0.0738	-0.1194 to 0.2670	No	ns	0.4886
hBMSC #2
PBS vs. rhOln	-0.5048	-0.8103 to -0.1993	Yes	**	0.0088
PBS vs. RGDS	0.2898	0.06952 to 0.5101	Yes	*	0.0199
RGDS vs. rhOln+RGDS	0.0598	-0.2173 to 0.3369	No	ns	0.8167
