# Supplementary material for: Integrin alpha11 is an Osteolectin receptor and is required for the maintenance of adult skeletal bone mass
Source: eLife. 2019 Jan 11;8:e42274. doi: 10.7554/eLife.42274 (PMC6349404; doi:10.7554/eLife.42274)
Supplement: Figure 2—source data 1. [file elife-42274-fig2-data1.xlsx]

## Sheet: Figure 2
Figure 2B (Statistical significance assessed using two-way repeated measures ANOVA followed by the Sidak's multiple comparisons test)		Wt			Oln KO
OD562	MC3T3-E1	1.0237	1.235	1.184	0.559	0.55	0.481
	hBMSC#1	0.832	0.75	0.773	0.421	0.428	0.31
	hBMSC#2	0.684	0.616	0.73	0.301	0.286	0.315
Figure 2C (Statistical significance assessed using two-way repeated measures ANOVA followed by the Sidak's multiple comparisons test)	MC3T3-E1 wt	MC3T3-E1 Oln KO	hMSC #1 wt	hMSC #1 Oln KO	hMSC #2 wt	hMSC #2 Oln KO
	0.653927	0.325832	1.06797	0.335612	1.15639	0.283148
	0.700862	0.324705	0.898048	0.484599	0.936032	0.357157
	1.15045	0.522029	1.01386	0.526631	0.945815	0.474549
	1.30785	0.252123	1.09041	0.56053	0.975781	0.397666
	1.1869	0.482032	0.929718	0.556658	0.98598	0.436674
Figure 2F (Statistical significance assessed per gene using two-way repeated measures ANOVA followed by the Sidak's multiple comparisons test)	ALP (PBS)	ALP (rOln)	axin2 (PBS)	axin2 (rOln)	lef1 (PBS)	lef1 (rOln)	RUNX2 (PBS)	RUNX2 (rOln)
MC3T3-E1	1.95422	5.7821	0.507999	2.26247	1.33179	7.93577	0.285443	2.72504
	1.11465	5.7621	0.61681	2.37495	0.791889	4.71863	1.77926	4.14472
	0.491954	3.74923	1.00898	2.98535	0.716168	4.78451	0.987105	2.96139
	0.748251	3.4025	1.49267	4.47813	1.10066	5.59202	1.2027	5.01509
	0.690922	2.79257	1.37354	5.72747	1.05949	5.95198	0.745497	3.38998
hBMSC #1	ALP (PBS)	ALP (rOln)	axin2 (PBS)	axin2 (rOln)	lef1 (PBS)	lef1 (rOln)	RUNX2 (PBS)	RUNX2 (rOln)
	1.2556	7.43009	1.92845	5.53063	0.479023	7.25094	0.459467	5.61013
	2.07538	6.55856	1.19951	4.52352	1.90286	5.57189	1.763	4.26645
	0.559953	1.47773	0.548075	5.41681	0.909514	4.91833	0.978087	3.44149
	0.445463	2.90468	0.513147	1.77454	0.743894	5.97181	0.772729	3.3013
	0.663597	2.70079	0.810815	2.07404	0.964711	3.79255	1.02671	3.15586
hBMSC #2	ALP (PBS)	ALP (rOln)	axin2 (PBS)	axin2 (rOln)	lef1 (PBS)	lef1 (rOln)	RUNX2 (PBS)	RUNX2 (rOln)
	0.328048	3.48698	0.422782	0.581554	0.745002	9.00244	0.703439	5.30553
	1.69582	3.58501	1.33144	1.83781	1.66476	6.87003	1.46662	5.74576
	4.47528	9.33066	3.45332	7.02738	1.25294	5.69745	2.1177	5.16045
	0.065697	2.2532	0.511564	2.19312	1.02478	4.53253	0.705881	1.35895
	0.072896	3.05671	0.569586	2.03918	0.882897	3.82462	0.761807	1.42158
	0.186465	0.908765	0.345794	1.01606	0.699947	5.83736	0.603949	2.32543
	0.175797	0.691106	0.365511	1.30856	0.72967	4.05673	0.640601	2.32543
Figure 2H (Statistical significance assessed per gene using two-way repeated measures ANOVA followed by the Sidak's multiple comparisons test)	ALP (wt)	ALP (Oln KO)	axin2 (wt)	axin2 (Oln KO)	lef1 (Wt)	lef1 (Oln KO)	RUNX2 (Wt)	RUNX2 (Oln KO)
MC3T3-E1	2.91893	0.732267	2.1644	1.02028	2.28438	0.302877	3.9739	0.380391
	1.87312	0.69037	2.20223	1.03811	1.9681	0.278704	4.72579	1.90601
	2.5499	0.926872	2.41825	1.00623	3.10976	0.638078	6.45562	0.590724
	2.29015	0.926872	2.11985	1.00623	1.90106	0.638078	6.66016	0.590724
	3.03236	1.72362	2.20988	0.929138	5.19385	3.14226	8.72743	1.53215
	ALP (wt)	ALP (Oln KO)	axin2 (wt)	axin2 (Oln KO)	lef1 (Wt)	lef1 (Oln KO)	RUNX2 (Wt)	RUNX2 (Oln KO)
hBMSC #1	6.25226	1.30983	4.7062	1.79572	7.42339	0.254737	1.76124	0.547751
	5.77323	1.42838	2.7598	0.474527	5.52923	1.09587	1.56547	1.03282
	3.25888	0.606836	1.58509	1.17655	4.71441	1.32141	3.298	1.17413
	5.36797	1.01352	5.18578	1.14438	7.84666	1.38711	7.36963	1.88765
	3.92959	0.641436	1.95147	0.408827	3.72458	0.940877	1.33015	0.357643
	ALP (wt)	ALP (Oln KO)	axin2 (wt)	axin2 (Oln KO)	lef1 (Wt)	lef1 (Oln KO)	RUNX2 (Wt)	RUNX2 (Oln KO)
hBMSC #2	2.27521	0.8072	2.39929	0.533149	11.9406	1.78114	3.38058	1.93492
	1.00417	0.523404	1.83733	1.11931	6.76366	1.68507	3.6738	1.40666
	4.29006	1.6144	1.89554	1.19965	9.40093	0.918788	2.8824	0.728132
	2.33108	1.16554	4.3851	1.09628	3.03733	0.379666	1.25464	0.627319
	4.15831	0.889457	2.01058	1.05162	1.78114	0.235338	1.12293	0.302975

## Sheet: Figure 2 Statistics
Figure 2B (Statistical significance assessed using two-way repeated measures ANOVA followed by the Sidak's multiple comparisons test)
Sidak's multiple comparisons test	Mean Diff.	95.00% CI of diff.	Significant?	Summary	Adjusted P Value
Oln+/+ vs Oln-/-
MC3T3-E1	0.6176	0.4466 to 0.7885	Yes	***	<0.0001
hBMSC#1	0.3987	0.2277 to 0.5696	Yes	***	0.0008
hBMSC#2	0.376	0.2051 to 0.5469	Yes	**	0.0011
Figure 2C (Statistical significance assessed using log2 two-way repeated measures ANOVA followed by the Sidak's multiple comparisons test)
Sidak's multiple comparisons test	Predicted (LS) mean diff.	95.00% CI of diff.	Significant?	Summary	Adjusted P Value
Oln+/+ - Oln-/-
MC3T3-E1	1.386	0.8305 to 1.941	Yes	***	<0.0001
hMSC #1	1.041	0.4855 to 1.596	Yes	***	0.0007
hMSC #2	1.377	0.8215 to 1.932	Yes	***	<0.0001
Figure 2F (Statistical significance assessed using log2 two-way repeated measures ANOVA followed by the Sidak's multiple comparisons test)
Sidak's multiple comparisons test	Predicted (LS) mean diff.	95.00% CI of diff.	Significant?	Summary	Adjusted P Value			Sidak's multiple comparisons test	Predicted (LS) mean diff.	95.00% CI of diff.	Significant?	Summary	Adjusted P Value			Sidak's multiple comparisons test	Predicted (LS) mean diff.	95.00% CI of diff.	Significant?	Summary	Adjusted P Value			Sidak's multiple comparisons test	Predicted (LS) mean diff.	95.00% CI of diff.	Significant?	Summary	Adjusted P Value
ALP								Axin2								Lef1								Runx2
PBS - rOln								PBS - rOln								PBS - rOln								PBS - rOln
MC3T3-E1	-2.213	-3.714 to -0.7117	Yes	**	0.004			MC3T3-E1	-1.862	-2.618 to -1.106	Yes	***	<0.0001			MC3T3-E1	-2.545	-3.311 to -1.779	Yes	***	<0.0001			MC3T3-E1	-2.061	-3.014 to -1.108	Yes	***	0.0001
hBMSC #1	-2.071	-3.572 to -0.5697	Yes	**	0.0066			hBMSC #1	-1.977	-2.733 to -1.221	Yes	***	<0.0001			hBMSC #1	-2.577	-3.343 to -1.811	Yes	***	<0.0001			hBMSC #1	-2.083	-3.036 to -1.130	Yes	***	0.0001
hBMSC #2	-2.9	-4.169 to -1.631	Yes	***	<0.0001			hBMSC #2	-1.326	-1.966 to -0.6872	Yes	***	0.0002			hBMSC #2	-2.517	-3.165 to -1.870	Yes	***	<0.0001			hBMSC #2	-1.689	-2.494 to -0.8832	Yes	***	0.0002
Figure 2H (Statistical significance assessed using log2 two-way repeated measures ANOVA followed by the Sidak's multiple comparisons test)
Sidak's multiple comparisons test	Predicted (LS) mean diff.	95.00% CI of diff.	Significant?	Summary	Adjusted P Value			Sidak's multiple comparisons test	Predicted (LS) mean diff.	95.00% CI of diff.	Significant?	Summary	Adjusted P Value			Sidak's multiple comparisons test	Predicted (LS) mean diff.	95.00% CI of diff.	Significant?	Summary	Adjusted P Value			Sidak's multiple comparisons test	Predicted (LS) mean diff.	95.00% CI of diff.	Significant?	Summary	Adjusted P Value
ALP								Axin2								Lef1								Runx2
Oln+/+ - Oln-/-								Oln+/+ - Oln-/-								Oln+/+ - Oln-/-								Oln+/+ - Oln-/-
MC3T3-E1	1.403	0.9009 to 1.905	Yes	***	<0.0001			MC3T3-E1	1.152	0.3439 to 1.960	Yes	**	0.0058			MC3T3-E1	2.064	0.9054 to 3.223	Yes	**	0.001			MC3T3-E1	2.83	1.965 to 3.695	Yes	***	<0.0001
hBMSC #1	2.343	1.841 to 2.845	Yes	***	<0.0001			hBMSC #1	1.759	0.9509 to 2.567	Yes	***	0.0002			hBMSC #1	2.704	1.545 to 3.863	Yes	***	<0.0001			hBMSC #1	1.527	0.6615 to 2.392	Yes	**	0.0011
hBMSC #2	1.414	0.9119 to 1.916	Yes	***	<0.0001			hBMSC #2	1.296	0.4879 to 2.104	Yes	**	0.0024			hBMSC #2	2.805	1.646 to 3.964	Yes	***	<0.0001			hBMSC #2	1.413	0.5475 to 2.278	Yes	**	0.0021
