# Supplementary material for: Integrin alpha11 is an Osteolectin receptor and is required for the maintenance of adult skeletal bone mass
Source: eLife. 2019 Jan 11;8:e42274. doi: 10.7554/eLife.42274 (PMC6349404; doi:10.7554/eLife.42274)
Supplement: Figure 3—source data 1. [file elife-42274-fig3-data1.xlsx]

## Sheet: Figure 3
Figure 3B (Statistical significance assessed using two-way repeated measures ANOVA followed by the Tukey's multiple comparisons test)	MC3T3-E1 + DMSO + PBS	MC3T3-E1 + AZD2858 + PBS	MC3T3-E1 + DMSO + rOln	MC3T3-E1 + AZD2858 + rOln	hMSC #1 + DMSO + PBS	hMSC #1 + AZD2858 + PBS	hMSC #1 + DMSO + rOln	hMSC #1 + AZD2858 + rOln	hMSC #2 + DMSO + PBS	hMSC #2 + AZD2858 + PBS	hMSC #2 + DMSO + rOln	hMSC #2 + AZD2858 + rOln
OD562	1.123	1.835	1.421	1.823	0.622	1.321	1.221	1.429	0.732	1.71	1.231	1.661
	1.321	2.145	1.725	2.125	0.6	1.33	1.324	1.794	0.853	1.635	1.223	1.73
	1.238	2.16	1.733	2.21	0.732	1.542	1.311	1.532	0.805	1.642	1.421	1.51
Figure 3D (Statistical significance assessed using two-way repeated measures ANOVA followed by the Tukey's multiple comparisons test)	MC3T3-E1 + DMSO + PBS	MC3T3-E1 + IWR-1-endo + PBS	MC3T3-E1 + DMSO + rOln	MC3T3-E1 + IWR-1-endo + rOln	hMSC #1 + DMSO + PBS	hMSC #1 + IWR-1-endo + PBS	hMSC #1 + DMSO + rOln	hMSC #1 + IWR-1-endo + rOln	hMSC #2 + DMSO + PBS	hMSC #2 + IWR-1-endo + PBS	hMSC #2 + DMSO + rOln	hMSC #2 + IWR-1-endo + rOln
OD562	1.123	0.321	1.535	0.531	0.722	0.321	1.021	0.23	0.732	0.321	1.21	0.213
	1.321	0.48	1.745	0.473	0.7	0.212	1.03	0.321	0.853	0.28	1.135	0.332
	1.238	0.217	1.66	0.295	0.732	0.285	1.242	0.222	0.805	0.217	1.042	0.271

## Sheet: Figure 3 Statistics
Figure 3B (Statistical significance assessed using two-way repeated measures ANOVA followed by the Tukey's multiple comparisons test)
Tukey's multiple comparisons test	Mean Diff.	95.00% CI of diff.	Significant?	Summary	Adjusted P Value
MC3T3E1
Vehicle vs. AZD2858	-0.8193	-1.036 to -0.6023	Yes	***	<0.0001
Vehicle vs. rOln	-0.399	-0.6161 to -0.1819	Yes	***	0.0003
AZD2858 vs. AZD2858+rOln	-0.006	-0.2231 to 0.2111	No	ns	0.9998
rOln vs. AZD2858+rOln	-0.4263	-0.6434 to -0.2093	Yes	***	0.0002
hBMSC#1
Vehicle vs. AZD2858	-0.7463	-0.9634 to -0.5293	Yes	***	<0.0001
Vehicle vs. rOln	-0.634	-0.8511 to -0.4169	Yes	***	<0.0001
AZD2858 vs. AZD2858+rOln	-0.1873	-0.4044 to 0.02973	No	ns	0.1051
rOln vs. AZD2858+rOln	-0.2997	-0.5167 to -0.08261	Yes	**	0.0053
hBMSC#2
Vehicle vs. AZD2858	-0.8657	-1.083 to -0.6486	Yes	***	<0.0001
Vehicle vs. rOln	-0.495	-0.7121 to -0.2779	Yes	***	<0.0001
AZD2858 vs. AZD2858+rOln	0.02867	-0.1884 to 0.2457	No	ns	0.9817
rOln vs. AZD2858+rOln	-0.342	-0.5591 to -0.1249	Yes	**	0.0016
Figure 3D (Statistical significance assessed using two-way repeated measures ANOVA followed by the Tukey's multiple comparisons test)
Tukey's multiple comparisons test	Mean Diff.	95.00% CI of diff.	Significant?	Summary	Adjusted P Value
MC3T3E1
Vehicle vs. IWR-1-endo	0.888	0.7023 to 1.074	Yes	***	<0.0001
Vehicle vs. rOln	-0.4193	-0.605 to -0.2336	Yes	***	<0.0001
IWR-1-endo vs. IWR-1-endo+rOln	-0.09367	-0.2794 to 0.09203	No	ns	0.5004
rOln vs. IWR-1-endo+rOln	1.214	1.028 to 1.399	Yes	***	<0.0001
hBMSC#1
Vehicle vs. IWR-1-endo	0.4453	0.2596 to 0.631	Yes	***	<0.0001
Vehicle vs. rOln	-0.3797	-0.5654 to -0.194	Yes	***	<0.0001
IWR-1-endo vs. IWR-1-endo+rOln	0.015	-0.1707 to 0.2007	No	ns	0.9957
rOln vs. IWR-1-endo+rOln	0.84	0.6543 to 1.026	Yes	***	<0.0001
hBMSC#2
Vehicle vs. IWR-1-endo	0.524	0.3383 to 0.7097	Yes	***	<0.0001
Vehicle vs. rOln	-0.3323	-0.518 to -0.1466	Yes	***	0.0004
IWR-1-endo vs. IWR-1-endo+rOln	0.0006667	-0.185 to 0.1864	No	ns	>0.9999
rOln vs. IWR-1-endo+rOln	0.857	0.6713 to 1.043	Yes	***	<0.0001
