# Supplementary material for: Integrin alpha11 is an Osteolectin receptor and is required for the maintenance of adult skeletal bone mass
Source: eLife. 2019 Jan 11;8:e42274. doi: 10.7554/eLife.42274 (PMC6349404; doi:10.7554/eLife.42274)
Supplement: Figure 4—source data 1. [file elife-42274-fig4-data1.xlsx]

## Sheet: Figure 4
Figure 4A (Statistical significance assessed per gene using two-way repeated measures ANOVA followed by the Tukey's multiple comparisons test)	MC3T3-E1 wt + PBS	MC3T3-E1 itga11 KO + PBS	MC3T3-E1 wt + rOln	MC3T3-E1 itga11 KO + rOln	hBMSC #1 wt + PBS	hBMSC #1 itga11 KO + PBS	hBMSC #1 wt + rOln	hBMSC #1 itga11 KO + rOln	hBMSC #2 wt + PBS	hBMSC #2 itga11 KO + PBS	hBMSC #2 wt + rOln	hBMSC #2 itga11 KO + rOln
OD562	0.741	0.485	1.765	0.535	0.854	0.317	1.451	0.32	0.72	0.31	1.014	0.542
	0.953	0.43	1.642	0.62	0.765	0.45	1.324	0.+H3:I5367	0.736	0.439	1.172	0.331
	1.185	0.582	1.87	0.375	0.72	0.389	1.282	0.596	0.591	0.373	1.061	0.349
Figure 4B (Statistical significance assessed per gene using two-way repeated measures ANOVA followed by the Tukey's multiple comparisons test)	MC3T3-E1 wt + PBS	MC3T3-E1 itga11 KO + PBS	MC3T3-E1 wt + rOln	MC3T3-E1 itga11 KO + rOln	hBMSC #1 wt + PBS	hBMSC #1 itga11 KO + PBS	hBMSC #1 wt + rOln	hBMSC #1 itga11 KO + rOln	hBMSC #2 wt + PBS	hBMSC #2 itga11 KO + PBS	hBMSC #2 wt + rOln	hBMSC #2 itga11 KO + rOln
Relative Dmp1 level	0.88742	0.329349	4.14878	0.338608	1.0581	0.277677	2.26025	0.130442	0.894719	0.163743	1.97864	0.113795
	0.863153	0.427113	3.21026	0.375709	0.93399	0.236757	2.32379	0.428236	0.897825	0.163743	2.33676	0.275382
	0.909212	0.448347	2.41611	0.436087	0.835945	0.227901	2.1532	0.243413	1.28299	0.151198	2.09872	0.3788
	0.938019	0.371823	1.96249	0.424162	1.09163	0.282531	1.39617	0.358857	1.15629	0.334368	4.34545	0.22368
	1.4022	0.453033	2.8337	0.397131	1.08034	0.276716	2.30774	0.309172	0.768175	0.199506	2.24157	0.212349
Figure 4D (Statistical significance assessed per gene using two-way repeated measures ANOVA followed by the Tukey's multiple comparisons test)	ALP (wt)	ALP (KO)	ALP (wt + rOln)	ALP (KO + rOln)	Axin2 (wt)	Axin2 (KO)	Axin2 (wt + rOln)	Axin2 (KO + rOln)	Lef1 (wt)	Lef1 (KO)	Lef1 (wt + rOln)	Lef1 (KO + rOln)	Runx2 (wt)	Runx2 (KO)	Runx2 (wt + rOln)	Runx2 (KO + rOln)
MC3T3-E1	3.29214	0.795	8.10621	1.27812	2.12092	0.659612	8.42508	1.00326	4.0337	0.480332	12.3129	0.703247	3.14002	0.414882	9.58496	0.158854
	2.11261	0.670834	8.62801	0.876015	2.15799	0.852452	4.11157	1.16448	3.47522	0.78301	15.7481	0.718023	3.73413	2.7717	14.5785	2.95012
	2.87593	1.02032	3.57769	0.951996	2.36968	1.16046	8.02605	0.646038	5.49113	1.08455	15.7481	1.08455	5.10097	0.578654	12.1322	1.64236
	1.944	1.21338	4.10968	1.05631	1.94489	1.10933	9.88123	1.09406	5.43433	1.31686	16.079	0.819095	5.06574	0.574657	12.0484	1.2318
	2.62811	1.30046	5.3853	1.13212	2.53976	1.21815	10.926	1.04224	5.37812	1.33524	13.1055	1.0921	3.59445	0.660107	15.9532	1.31565
	ALP (wt)	ALP (KO)	ALP (wt + rOln)	ALP (KO + rOln)	Axin2 (wt)	Axin2 (KO)	Axin2 (wt + rOln)	Axin2 (KO + rOln)	Lef1 (wt)	Lef1 (KO)	Lef1 (wt + rOln)	Lef1 (KO + rOln)	Runx2 (wt)	Runx2 (KO)	Runx2 (wt + rOln)	Runx2 (KO + rOln)
hBMSC #1	5.93648	2.0916	8.87414	1.10927	4.39642	1.87427	9.9268	1.05799	3.69459	0.320949	14.275	0.144127	4.94107	0.726897	13.4062	0.404671
	5.48164	1.58514	12.1224	1.87854	2.57814	0.547651	10.2769	0.681284	3.89174	1.05002	12.1292	1.8666	4.39183	0.840793	15.1876	1.53669
	3.09429	0.513917	9.4127	0.496411	1.48075	0.911509	5.01527	0.997458	4.69269	1.32447	10.9315	1.36171	4.62619	1.09416	19.7643	1.35644
	2.79841	0.39766	9.84648	0.461566	1.8357	0.856383	4.38121	0.707758	5.98112	1.09841	21.1915	1.22724	3.7969	1.29219	14.0727	4.24223
	3.51764	0.411684	9.88066	0.479502	1.19443	0.810188	4.84443	0.785307	5.89877	1.20616	21.4873	1.16104	4.15493	1.04596	18.8282	1.01736
	ALP (wt)	ALP (KO)	ALP (wt + rOln)	ALP (KO + rOln)	Axin2 (wt)	Axin2 (KO)	Axin2 (wt + rOln)	Axin2 (KO + rOln)	Lef1 (wt)	Lef1 (KO)	Lef1 (wt + rOln)	Lef1 (KO + rOln)	Runx2 (wt)	Runx2 (KO)	Runx2 (wt + rOln)	Runx2 (KO + rOln)
hBMSC #2	4.71543	1.3826	13.3372	1.35885	4.30844	1.34976	6.07197	1.02255	9.13007	1.9454	24.4307	2.5948	3.80956	1.37495	8.69162	1.70483
	2.08116	0.663141	7.42499	0.740919	3.29931	0.553901	10.4264	0.871858	5.17165	0.468157	13.2749	0.622275	2.92741	1.03482	9.18719	1.301
	8.89126	1.98259	9.83134	0.331571	3.40385	1.09634	7.32163	1.64966	3.59409	0.586444	15.1961	0.38572	3.24816	0.59024	7.25826	0.83487
	7.98553	0.52029	16.138	0.382197	3.95086	1.03323	9.79581	1.53386	5.62021	0.832559	12.343	0.680952	2.84736	0.823377	11.3108	0.864312
	7.09788	0.451372	16.8817	0.460856	3.26519	0.807853	12.792	1.79274	6.4336	0.635351	14.277	0.806991	3.59159	0.76558	10.6636	1.22232
Figure 4F (Statistical significance assessed per gene using two-way repeated measures ANOVA followed by the Dunnett's multiple comparisons test)	ALP (PBS)	ALP (rhOln)	ALP (rhCol1a)	Axin2 (PBS)	Axin2 (rhOln)	Axin2 (rhCol1a)	Lef1 (PBS)	Lef1 (rhOln)	Lef1 (rhCol1a)	Runx2 (PBS)	Runx2 (rhOln)	Runx2 (rhCol1a)
MC3T3-E1	0.843212	3.96953	0.982117	0.357644	0.743084	0.355174	0.60679	6.29527	0.641387	0.281322	4.39327	0.318705
	1.7159	2.72068	0.831603	0.410825	2.65111	0.223229	1.01696	6.36106	0.903921	2.10715	8.42861	1.55326
	0.828726	2.95666	0.90687	1.43058	2.9518	1.28485	1.23479	3.98414	1.06383	0.66218	3.31796	0.717124
	0.888207	3.00834	0.806065	1.4708	4.00443	1.25405	0.752242	8.62945	1.07495	1.05723	4.09907	0.790203
	0.723953	3.23545	0.982117	1.33016	4.39724	1.43058	1.38921	9.50883	1.27391	0.892111	3.93209	0.704804
	ALP (PBS)	ALP (rhOln)	ALP (rhCol1a)	Axin2 (PBS)	Axin2 (rhOln)	Axin2 (rhCol1a)	Lef1 (PBS)	Lef1 (rhOln)	Lef1 (rhCol1a)	Runx2 (PBS)	Runx2 (rhOln)	Runx2 (rhCol1a)
hBMSC #1	1.08476	7.58095	1.30801	1.88148	5.10485	1.3869	0.518766	7.82535	0.501095	0.780566	4.23568	0.640643
	2.13966	6.8087	2.09562	1.5712	3.47465	1.43581	2.27073	8.24292	2.06788	1.74423	4.43088	1.66739
	0.561508	1.18294	0.516693	0.441923	5.32163	0.354011	0.728578	7.50658	0.587701	0.76982	1.86942	0.73846
	0.52755	2.36588	1.05876	0.50588	5.90472	0.514723	0.70376	4.75075	0.711115	0.902871	3.62402	1.14678
	0.686523	1.4019	0.595585	0.599515	2.8816	0.551666	0.778169	6.97965	0.872456	0.802511	3.6366	0.893533
	ALP (PBS)	ALP (rhOln)	ALP (rhCol1a)	Axin2 (PBS)	Axin2 (rhOln)	Axin2 (rhCol1a)	Lef1 (PBS)	Lef1 (rhOln)	Lef1 (rhCol1a)	Runx2 (PBS)	Runx2 (rhOln)	Runx2 (rhCol1a)
hBMSC #2	2.14285	3.71801	1.2138	1.24438	1.03557	0.917273	2.14311	12.726	1.87216	2.38198	4.14727	1.49191
	2.09149	6.42871	3.24795	0.742479	4.34821	1.13715	1.62981	13.0385	3.15952	0.902601	4.30842	0.964037
	0.278265	0.472875	0.281173	0.867793	1.4747	0.920457	0.389503	0.66191	0.345009	0.50774	0.862837	0.500749
	0.233992	2.13544	0.384094	1.00029	9.48352	0.986522	0.396311	2.23412	0.367217	0.610118	1.84313	0.549869
	0.253407	2.22612	0.228383	1.14506	0.73735	0.699998	0.441262	3.50571	0.258764	0.597562	1.3353	0.396986
Figure 4J (Statistical significance assessed using log2 two-way repeated measures ANOVA followed by the Sidak's multiple comparisons test)
Relative Ctnnb1 level	PBS 6h	rOln 6h	PBS 24h	rOln 24h
	0.902262	1.22401	0.990767	1.53328
	0.990767	1.26718	0.740524	0.683786
	1.10697	0.743095	1.35343	0.963674

## Sheet: Figure 4 Statistics
Figure 4A (Statistical significance assessed using two-way repeated measures ANOVA followed by the Tukey's multiple comparisons test)
Tukey's multiple comparisons test	Mean Diff.	95.00% CI of diff.	Significant?	Summary	Adjusted P Value
MC3T3-1
wt + PBS vs. wt + rOln	-0.7993	-1.077 to -0.5214	Yes	***	<0.0001
wt + PBS vs. KO + PBS	0.4607	0.1827 to 0.7386	Yes	***	0.001
hBMSC#1
wt + PBS vs. wt + rOln	-0.5727	-0.8506 to -0.2947	Yes	***	<0.0001
wt + PBS vs. KO + PBS	0.3943	0.1164 to 0.6723	Yes	**	0.0042
hBMSC#2
wt + PBS vs. wt + rOln	-0.4	-0.678 to -0.122	Yes	**	0.0037
wt + PBS vs. KO + PBS	0.3083	0.03037 to 0.5863	Yes	*	0.0267
Figure 4B (Statistical significance assessed using log2 two-way repeated measures ANOVA followed by the Tukey's multiple comparisons test)
Tukey's multiple comparisons test	Mean Diff.	95.00% CI of diff.	Significant?	Summary	Adjusted P Value
MC3T3-E1
Itga11+/+ PBS vs. Itga11-/- PBS	1.286	0.7995 to 1.773	Yes	**	0.0015
Itga11+/+ PBS vs. Itga11+/+ rOln	-1.522	-2.482 to -0.5622	Yes	*	0.0102
Itga11-/- PBS vs. Itga11-/- rOln	0.037	-0.2548 to 0.3288	No	ns	0.9509
hBMSC #1
Itga11+/+ PBS vs. Itga11-/- PBS	1.94	1.866 to 2.014	Yes	***	<0.0001
Itga11+/+ PBS vs. Itga11+/+ rOln	-1.045	-1.782 to -0.3075	Yes	*	0.0153
Itga11-/- PBS vs. Itga11-/- rOln	-0.073	-1.375 to 1.229	No	ns	0.9951
hBMSC #2
Itga11+/+ PBS vs. Itga11-/- PBS	2.345	1.417 to 3.273	Yes	**	0.0018
Itga11+/+ PBS vs. Itga11+/+ rOln	-1.338	-2.154 to -0.5221	Yes	**	0.009
Itga11-/- PBS vs. Itga11-/- rOln	-0.212	-1.711 to 1.287	No	ns	0.9345
Figure 4D (Statistical significance assessed using log2 two-way repeated measures ANOVA followed by the Tukey's multiple comparisons test)
Tukey's multiple comparisons test	Mean Diff.	95.00% CI of diff.	Significant?	Summary	Adjusted P Value		Tukey's multiple comparisons test	Mean Diff.	95.00% CI of diff.	Significant?	Summary	Adjusted P Value		Tukey's multiple comparisons test	Mean Diff.	95.00% CI of diff.	Significant?	Summary	Adjusted P Value		Tukey's multiple comparisons test	Mean Diff.	95.00% CI of diff.	Significant?	Summary	Adjusted P Value
ALP							Axin2							Lef1							Runx2
MC3T3-E1							MC3T3-E1							MC3T3-E1							MC3T3-E1
Itga11+/+ vs. Itga11-/-	1.379	0.3982 to 2.360	Yes	*	0.0157		Itga11+/+ vs. Itga11-/-	1.185	0.5715 to 1.799	Yes	**	0.0049		Itga11+/+ vs. Itga11-/-	2.323	1.528 to 3.118	Yes	**	0.001		Itga11+/+ vs. Itga11-/-	2.415	0.3298 to 4.500	Yes	*	0.0308
Itga11+/+ vs. Itga11+/+ rOln	-1.152	-2.271 to -0.03262	Yes	*	0.0456		Itga11+/+ vs. Itga11+/+ rOln	-1.826	-2.815 to -0.8367	Yes	**	0.0058		Itga11+/+ vs. Itga11+/+ rOln	-1.632	-2.235 to -1.029	Yes	**	0.0013		Itga11+/+ vs. Itga11+/+ rOln	-1.645	-2.390 to -0.8995	Yes	**	0.003
Itga11-/- vs. Itga11-/- rOln	-0.114	-0.8436 to 0.6156	No	ns	0.9152		Itga11-/- vs. Itga11-/- rOln	0.007	-1.044 to 1.058	No	ns	>0.9999		Itga11-/- vs. Itga11-/- rOln	0.11	-0.7097 to 0.9297	No	ns	0.9429		Itga11-/- vs. Itga11-/- rOln	-0.461	-2.562 to 1.640	No	ns	0.81
hBMSC #1							hBMSC #1							hBMSC #1							hBMSC #1
Itga11+/+ vs. Itga11-/-	2.359	1.119 to 3.599	Yes	**	0.0052		Itga11+/+ vs. Itga11-/-	1.165	-0.03421 to 2.364	No	ns	0.0548		Itga11+/+ vs. Itga11-/-	2.395	1.150 to 3.640	Yes	**	0.005		Itga11+/+ vs. Itga11-/-	2.155	1.332 to 2.978	Yes	**	0.0015
Itga11+/+ vs. Itga11+/+ rOln	-1.327	-2.206 to -0.4477	Yes	*	0.0122		Itga11+/+ vs. Itga11+/+ rOln	-1.641	-2.374 to -0.9075	Yes	**	0.0028		Itga11+/+ vs. Itga11+/+ rOln	-1.7	-2.230 to -1.170	Yes	***	0.0007		Itga11+/+ vs. Itga11+/+ rOln	-1.879	-2.408 to -1.350	Yes	***	0.0005
Itga11-/- vs. Itga11-/- rOln	0.057	-0.8433 to 0.9573	No	ns	0.9931		Itga11-/- vs. Itga11-/- rOln	0.14	-0.6621 to 0.9421	No	ns	0.8883		Itga11-/- vs. Itga11-/- rOln	0.036	-1.266 to 1.338	No	ns	0.9994		Itga11-/- vs. Itga11-/- rOln	-0.402	-2.153 to 1.349	No	ns	0.7905
hBMSC #2							hBMSC #2							hBMSC #2							hBMSC #2
Itga11+/+ vs. Itga11-/-	2.7	0.5814 to 4.819	Yes	*	0.0222		Itga11+/+ vs. Itga11-/-	1.967	1.280 to 2.653	Yes	**	0.0011		Itga11+/+ vs. Itga11-/-	2.881	1.943 to 3.819	Yes	***	0.0008		Itga11+/+ vs. Itga11-/-	1.89	1.087 to 2.694	Yes	**	0.0023
Itga11+/+ vs. Itga11+/+ rOln	-1.149	-2.311 to 0.01315	No	ns	0.0519		Itga11+/+ vs. Itga11+/+ rOln	-1.308	-2.332 to -0.2845	Yes	*	0.022		Itga11+/+ vs. Itga11+/+ rOln	-1.429	-2.130 to -0.7281	Yes	**	0.004		Itga11+/+ vs. Itga11+/+ rOln	-1.512	-2.142 to -0.8823	Yes	**	0.0021
Itga11-/- vs. Itga11-/- rOln	0.572	-1.513 to 2.657	No	ns	0.7001		Itga11-/- vs. Itga11-/- rOln	-0.5127	-1.538 to 0.5129	No	ns	0.3113		Itga11-/- vs. Itga11-/- rOln	-0.05534	-0.9162 to 0.8055	No	ns	0.9928		Itga11-/- vs. Itga11-/- rOln	-0.3772	-0.7892 to 0.03488	No	ns	0.0661
Figure 4F (Statistical significance assessed using log2 two-way repeated measures ANOVA followed by the Dunnett's multiple comparisons test)
Dunnett's multiple comparisons test	Mean Diff.	95.00% CI of diff.	Significant?	Summary	Adjusted P Value		Dunnett's multiple comparisons test	Mean Diff.	95.00% CI of diff.	Significant?	Summary	Adjusted P Value		Dunnett's multiple comparisons test	Mean Diff.	95.00% CI of diff.	Significant?	Summary	Adjusted P Value		Dunnett's multiple comparisons test	Mean Diff.	95.00% CI of diff.	Significant?	Summary	Adjusted P Value
ALP							Axin2							Lef1							Runx2
MC3T3-E1							MC3T3-E1							MC3T3-E1							MC3T3-E1
PBS vs. rhOln	-1.731	-2.663 to -0.7987	Yes	**	0.0061		PBS vs. rhOln	-1.592	-2.594 to -0.5899	Yes	*	0.0107		PBS vs. rhOln	-2.801	-3.875 to -1.727	Yes	**	0.0017		PBS vs. rhOln	-2.477	-3.727 to -1.227	Yes	**	0.0048
PBS vs. rhCol1A	0.079	-0.7777 to 0.9357	No	ns	0.9355		PBS vs. rhCol1A	0.234	-0.3340 to 0.8019	No	ns	0.3795		PBS vs. rhCol1A	-0.017	-0.4617 to 0.4277	No	ns	0.9883		PBS vs. rhCol1A	0.181	-0.2677 to 0.6297	No	ns	0.3914
hBMSC #1							hBMSC #1							hBMSC #1							hBMSC #1
PBS vs. rhOln	-1.749	-2.863 to -0.6348	Yes	*	0.0112		PBS vs. rhOln	-2.397	-4.092 to -0.7022	Yes	*	0.0161		PBS vs. rhOln	-3.012	-4.148 to -1.876	Yes	**	0.0016		PBS vs. rhOln	-1.85	-2.612 to -1.088	Yes	**	0.0023
PBS vs. rhCol1A	-0.184	-0.9134 to 0.5454	No	ns	0.6473		PBS vs. rhCol1A	0.197	-0.07385 to 0.4679	No	ns	0.1218		PBS vs. rhCol1A	0.063	-0.1981 to 0.3241	No	ns	0.6687		PBS vs. rhCol1A	-0.018	-0.3734 to 0.3374	No	ns	0.9797
hBMSC #2							hBMSC #2							hBMSC #2							hBMSC #2
PBS vs. rhOln	-1.901	-3.680 to -0.1218	Yes	*	0.0408		PBS vs. rhOln	-1.132	-3.662 to 1.398	No	ns	0.3341		PBS vs. rhOln	-2.364	-3.732 to -0.9965	Yes	**	0.0079		PBS vs. rhOln	-1.315	-2.238 to -0.3923	Yes	*	0.0157
PBS vs. rhCol1A	-0.079	-1.009 to 0.8510	No	ns	0.9448		PBS vs. rhCol1A	0.094	-0.6607 to 0.8487	No	ns	0.8876		PBS vs. rhCol1A	0.059	-0.8680 to 0.9860	No	ns	0.9683		PBS vs. rhCol1A	0.268	-0.2430 to 0.7790	No	ns	0.2524
Figure 4J (Statistical significance assessed using log2 two-way repeated measures ANOVA followed by the Sidak's multiple comparisons test)
Sidak's multiple comparisons test	Predicted (LS) mean diff.	95.00% CI of diff.	Significant?	Summary	Adjusted P Value
PBS - rOln
6h	-0.07333	-1.212 to 1.066	No	ns	0.9723
24h	-0.008333	-1.147 to 1.131	No	ns	0.9996
