# Supplementary material for: Integrin alpha11 is an Osteolectin receptor and is required for the maintenance of adult skeletal bone mass
Source: eLife. 2019 Jan 11;8:e42274. doi: 10.7554/eLife.42274 (PMC6349404; doi:10.7554/eLife.42274)
Supplement: Figure 5—figure supplement 1—source data 1. [file elife-42274-fig5-figsupp1-data1.xlsx]

## Sheet: Figure 5-figure supplement 1
Figure 5-figure supplement 1
Relative Itga11 level	wt (2mo)	KO (2mo)	wt (6mo)	KO (6mo)
	1	0.27578	1	0.143
	1	0.1573	1	0.042
	1	0.135	1	0.114
	1	0.147	1	0.069
