# Supplementary material for: Integrin alpha11 is an Osteolectin receptor and is required for the maintenance of adult skeletal bone mass
Source: eLife. 2019 Jan 11;8:e42274. doi: 10.7554/eLife.42274 (PMC6349404; doi:10.7554/eLife.42274)
Supplement: Figure 5—source data 1. [file elife-42274-fig5-data1.xlsx]

## Sheet: Figure 5
Figure 5 (Statistical significance assessed using two-way repeated measures ANOVA followed by the Sidak's multiple comparisons test)
Figure 5B
body length (cm)	Control males			Lepr-cre; itga11fl/fl males			Control females			Lepr-cre; itga11fl/fl females
	2m	6m	12m	2m	6m	12m	2m	6m	12m	2m	6m	12m
	9.4	10.3	11.2	9.4	10.1	10.8	8.7	9.5	9.7	8.5	9.3	9.3
	9.3	10.2	10.8	9.3	10.6	10.8	8.6	9.2	9.4	8.6	9.5	9.7
	9.3	10.8	11	9.2	10.8	10.2	8.7	9.5	9.1	8.6	9.6	9.1
	9.4	10.7	10.7	9.4	10.6	11	8.7	9.5	9.2	8.7	9.1	9.5
		10.5	10.5		10.3	10.8		9.4	9.1		9.3	9.5
			10.6			10.7		9.3	9.7		9.4	9.5
									9.1			9.5
Figure 5C	Control males			Lepr-cre; itga11fl/fl males			Control females			Lepr-cre; itga11fl/fl females
body mass (g)	2m	6m	12m	2m	6m	12m	2m	6m	12m	2m	6m	12m
	22.8	28.1	42.7	24.2	30.1	47.2	16.2	22.4	35.2	17.1	26.2	36.1
	23.4	25.1	39.6	24.1	27.5	41.2	15.8	26.2	24.3	15.3	20.5	28.7
	23.2	32.1	41.4	23.2	24.3	42.5	16.3	21.4	26.4	17.2	23.4	35.3
	24.1	25.6	40.5	24.1	25.2	38.1	16.2	25.2	27.4	16.1	21.2	23.5
		31.2	42.3		28.3	41.2		23.5	38.2		28.4	23.5
			40.6			43		23.1	28.7		22.1	34.2
									35.3			23.5
Figure 5D	Control males			Lepr-cre; itga11fl/fl males			Control females			Lepr-cre; itga11fl/fl females
femoral length (mm)	2m	6m	12m	2m	6m	12m	2m	6m	12m	2m	6m	12m
	13.2	16.3	18.1	13.4	16.1	17.5	12.5	15.5	16.5	12.8	15.5	17.2
	13.2	16.5	17.7	13.2	16.4	17.7	12.5	15.8	17.8	12.5	15.5	15.1
	13.3	16.2	17.9	13.5	16.3	18.3	12.7	15.2	16.1	12.3	15.3	16.1
	13.5	16.3	17.6	13.4	16.2	17.9	12.5	15.7	15.9	12.6	15.2	17.5
		16.2	17.8		16	17.7		15.5	15.9		15.8	16.9
			17.4			18		15.2	15.1		15.7	15.3
									16.1			16.9
Figure 5E	Control			Lepr-cre; itga11fl/fl
serum Osteolectin (ng/ml)	2m	6m	12m	2m	6m	12m
	1.32515	1.28102	0.258729	1.53692	1.28102	0.181728
	1.30939	1.15515	0.221752	1.40722	1.18344	0.311164
	1.40722	1.1363	0.311164	1.78782	1.28102	0.277228
	1.57495	1.02648	0.332772	1.54326	1.57178	0.280312
	1.58129	1.03275	0.252564	1.721	1.30939	0.342036
	1.56227	1.21805	0.308078	1.6384	1.6384	0.342036
	1.26212	1.24637	0.240237	1.56227	1.1363	0.200196
	1.60032	0.848183	0.249482	1.33462	1.44831	0.280312
Figure 5G	Control males			Lepr-cre; itga11fl/fl males			Control females			Lepr-cre; itga11fl/fl females
trabecular BV/TV (%)	2m	6m	12m	2m	6m	12m	2m	6m	12m	2m	6m	12m
	9.51	8.05	6.36	10.31	4.85	1.67	7.85	5.62	1.12	7.27	1.05	0.05
	11.45	9.17	3.02	10.51	3.57	1.35	7.48	4.05	1.33	7.02	1.65	0.24
	11.2	8.55	3.12	12.04	6.18	1.61	6.37	5.47	0.23	5.8	0.7	0.17
	12.23	7.97	4.63	14.01	2.46	2.1	4.44	5.14	0.49	4.5	0.97	0.03
		8.47	4.5		2.74	2.35		2.32	1.65		0.55	0.11
			5.35			3.54		3.05	0.47		1.86	0.15
									0.17			0.11
Figure 5H	Control males			Lepr-cre; itga11fl/fl males			Control females			Lepr-cre; itga11fl/fl females
trabecular number	2m	6m	12m	2m	6m	12m	2m	6m	12m	2m	6m	12m
	5.3763	5.2464	2.2763	5.6999	4.2643	2.0572	5.0529	4.476	2.6663	4.9703	3.1807	1.8345
	5.8743	5.7289	3.1482	5.25	4.446	2.9055	4.8799	4.4976	2.6354	5.0174	3.9327	2.793
	5.9694	5.1622	2.7839	5.8777	4.4571	2.4142	4.83	4.6722	1.679	4.8001	2.9839	1.9733
	5.6097	5.7479	3.1473	6.4082	3.4285	2.7426	4.2766	4.1381	2.3049	4.1189	3.6691	2.372
		5.6978	2.3758		3.2826	2.0955		3.6621	2.0356		2.7072	2.1375
			2.9819			2.3918		3.2945	2.0709		3.538	2.1117
									1.9733			2.1375
Figure 5I	Control males			Lepr-cre; itga11fl/fl males			Control females			Lepr-cre; itga11fl/fl females
trabecular thickness (mm)	2m	6m	12m	2m	6m	12m	2m	6m	12m	2m	6m	12m
	0.0284	0.0352	0.0572	0.0295	0.0308	0.0403	0.0281	0.0328	0.0292	0.027	0.024	0.016
	0.0306	0.0309	0.0379	0.0311	0.0298	0.034	0.0276	0.0308	0.0271	0.0269	0.0306	0.0198
	0.0299	0.0358	0.0383	0.0318	0.035	0.0284	0.0288	0.0299	0.0274	0.0265	0.0166	0.0182
	0.0329	0.0377	0.0438	0.0315	0.0282	0.0204	0.0248	0.0355	0.0309	0.0249	0.0195	0.0181
		0.0308	0.0456		0.0291	0.034		0.0248	0.0421		0.019	0.0172
			0.0452			0.0437		0.0279	0.0207		0.022	0.0161
									0.0182			0.0172
Figure 5J	Control males			Lepr-cre; itga11fl/fl males			Control females			Lepr-cre; itga11fl/fl females
trabecular spacing (mm)	2m	6m	12m	2m	6m	12m	2m	6m	12m	2m	6m	12m
	0.1951	0.2027	0.4828	0.1848	0.2432	0.5042	0.207	0.2327	0.3783	0.2084	0.3165	0.5479
	0.1834	0.1873	0.3249	0.2046	0.2296	0.3495	0.2162	0.2298	0.3828	0.208	0.2567	0.367
	0.1774	0.2065	0.3704	0.182	0.2362	0.4218	0.2173	0.2234	0.5974	0.2155	0.3378	0.5057
	0.1908	0.1845	0.3313	0.1696	0.2972	0.3719	0.2393	0.2507	0.435	0.2478	0.2743	0.4215
		0.1869	0.4463		0.3106	0.3495		0.2774	0.5029		0.3736	0.4746
			0.3551			0.4301		0.3125	0.4866		0.3854	0.473
									0.5057			0.4746
Figure 5K	Control males			Lepr-cre; itga11fl/fl males			Control females			Lepr-cre; itga11fl/fl females
trabecular connectivity density (103/mm3)	2m	6m	12m	2m	6m	12m	2m	6m	12m	2m	6m	12m
	583.973	314.801	36.6673	798.294	175.802	14.2603	744.216	301.04	32.068	537.835	60.4924	2.9337
	655.014	614.221	34.2161	844.808	125.072	17.8927	640.839	419.658	34.7574	584.733	108.733	9.3436
	686.492	273.618	49.8964	690.187	236.943	11.5239	482.877	341.767	2.9364	527.319	72.276	11.6048
	728.024	303.832	50.2585	993.453	111.089	25.5366	323.156	221.826	7.5295	272.051	74.6867	12.3921
		435.783	30.2175		68.9183	17.8927		83.1268	15.497		34.2273	6.0616
			62.6352			23.2469		142.052	22.7882		114.365	8.6867
									11.6048			6.0616
Figure 5L	Control males			Lepr-cre; itga11fl/fl males			Control females			Lepr-cre; itga11fl/fl females
trabecular BMD (mg/HA ccm)	2m	6m	12m	2m	6m	12m	2m	6m	12m	2m	6m	12m
	916.563	958.031	984.288	928.666	944.341	964.778	917.489	957.965	966.365	917.356	928.071	905.319
	922.185	941.497	983.561	937.198	981.643	951.351	917.687	949.83	963.851	918.216	968.68	899.697
	919.87	957.965	966.431	949.169	948.375	948.309	932.238	937.926	953.269	942.423	879.195	914.181
	925.029	985.346	978.666	930.65	913.058	953.6	933.494	948.904	991.233	925.095	883.427	927.674
		957.502	968.15		958.097	951.351		921.523	985.082		913.322	882.501
			971.788			954.063		936.404	936.139		904.327	897.779
									914.181			882.501
Figure 5M
trabecular MAR (mm/day)	Control females			Lepr-cre; itga11fl/fl females			Control males			Lepr-cre; itga11fl/fl males
6m	1.93	2.07	2.05	1.63	1.87	1.75	1.72	1.82	1.75	1.42	1.44	1.56
12m	1.52	1.64	1.48	1.21	1.24	1.04	1.45	1.32	1.38	1.21	1.13	1.15
Figure 5N
urine DPD/creatine (nmol/mmol)	Control						Lepr-cre; itga11fl/fl
6m	21.1361	23.0894	32.4704	22.944	22.3817		26.048	29.7827	23.9499	19.5658	26.0873
12m	12.3	13.9645	12.2699	12.9297			17.0714	13.4713	12.3484	6.87685
Figure 5O
serum P1NP (ng/ml)	Control		Lepr-cre; itga11fl/fl
	6m	12m	6m	12m
	25.232	18.427	23.01	13.591
	26.85	18.552	21.856	14.772
	23.23	18.57	21.017	14.85
	24.7	19.295	20.775	14.827
	25.827	20.868	21.048	16.37

## Sheet: Figure 5 Statistics
Figure 5 (Statistical significance assessed using two-way repeated measures ANOVA followed by the Sidak's multiple comparisons test)
5B
Sidak's multiple comparisons test	Predicted (LS) mean diff.	95.00% CI of diff.	Significant?	Summary	Adjusted P Value			Sidak's multiple comparisons test	Predicted (LS) mean diff.	95.00% CI of diff.	Significant?	Summary	Adjusted P Value
male								female
Lepr-cre; itga11fl/fl - control								Lepr-cre; itga11fl/fl - control
2m	0.025	-0.4137 to 0.4637	No	ns	0.9981			2m	0.075	-0.2777 to 0.4277	No	ns	0.9226
6m	0.02	-0.3724 to 0.4124	No	ns	0.9987			6m	0.03333	-0.2547 to 0.3213	No	ns	0.9859
12m	0.08333	-0.2749 to 0.4415	No	ns	0.8971			12m	-0.1143	-0.3809 to 0.1524	No	ns	0.6029
5C
Sidak's multiple comparisons test	Predicted (LS) mean diff.	95.00% CI of diff.	Significant?	Summary	Adjusted P Value			Sidak's multiple comparisons test	Predicted (LS) mean diff.	95.00% CI of diff.	Significant?	Summary	Adjusted P Value
male								female
Lepr-cre; itga11fl/fl - control								Lepr-cre; itga11fl/fl - control
2m	-0.525	-4.565 to 3.515	No	ns	0.9792			2m	-0.3	-8.998 to 8.398	No	ns	0.9996
6m	1.34	-2.274 to 4.954	No	ns	0.6918			6m	0	-7.102 to 7.102	No	ns	>0.9999
12m	-1.017	-4.315 to 2.282	No	ns	0.7946			12m	1.529	-5.046 to 8.104	No	ns	0.902
5D
Sidak's multiple comparisons test	Predicted (LS) mean diff.	95.00% CI of diff.	Significant?	Summary	Adjusted P Value			Sidak's multiple comparisons test	Predicted (LS) mean diff.	95.00% CI of diff.	Significant?	Summary	Adjusted P Value
male								female
Lepr-cre; itga11fl/fl - control								Lepr-cre; itga11fl/fl - control
2m	-0.075	-0.4842 to 0.3342	No	ns	0.9455			2m	0	-1.285 to 1.285	No	ns	>0.9999
6m	0.1	-0.2660 to 0.4660	No	ns	0.8458			6m	-0.01667	-1.066 to 1.033	No	ns	>0.9999
12m	-0.1	-0.4341 to 0.2341	No	ns	0.8082			12m	-0.2286	-1.200 to 0.7429	No	ns	0.8989
Figure 5E: Statistical comparison using two-way ANOVA followed by Sidak's test
Sidak's multiple comparisons test	Mean Diff.	95.00% CI of diff.	Significant?	Summary	Adjusted P Value
Control vs KO
2m	-0.1088	-0.382 to 0.1644	No	ns	0.6763
6m	-0.2789	-0.5521 to -0.005686	Yes	*	0.0445
12m	-0.007302	-0.2805 to 0.2659	No	ns	0.9998
5G
Sidak's multiple comparisons test	Predicted (LS) mean diff.	95.00% CI of diff.	Significant?	Summary	Adjusted P Value			Sidak's multiple comparisons test	Predicted (LS) mean diff.	95.00% CI of diff.	Significant?	Summary	Adjusted P Value
male								female	(log2-transformed)
Lepr-cre; itga11fl/fl - control								Lepr-cre; itga11fl/fl - control
2m	-0.62	-2.445 to 1.205	No	ns	0.7441			2m	0.07954	-1.547 to 1.706	No	ns	0.9989
6m	4.482	2.850 to 6.114	Yes	***	<0.0001			6m	1.98	0.6513 to 3.308	Yes	**	0.0037
12m	2.393	0.9035 to 3.883	Yes	**	0.0024			12m	2.515	1.285 to 3.745	Yes	***	0.0002
5H
Sidak's multiple comparisons test	Predicted (LS) mean diff.	95.00% CI of diff.	Significant?	Summary	Adjusted P Value			Sidak's multiple comparisons test	Predicted (LS) mean diff.	95.00% CI of diff.	Significant?	Summary	Adjusted P Value
male								female
Lepr-cre; itga11fl/fl - control								Lepr-cre; itga11fl/fl - control
2m	-0.1015	-0.8646 to 0.6615	No	ns	0.9778			2m	0.03318	-0.6149 to 0.6813	No	ns	0.9987
6m	1.541	0.8584 to 2.223	Yes	***	0.0001			6m	0.7882	0.2590 to 1.317	Yes	**	0.0037
12m	0.3511	-0.2719 to 0.9741	No	ns	0.3738			12m	0.0008429	-0.4891 to 0.4908	No	ns	>0.9999
5I
Sidak's multiple comparisons test	Predicted (LS) mean diff.	95.00% CI of diff.	Significant?	Summary	Adjusted P Value			Sidak's multiple comparisons test	Predicted (LS) mean diff.	95.00% CI of diff.	Significant?	Summary	Adjusted P Value
male								female
Lepr-cre; itga11fl/fl - control								Lepr-cre; itga11fl/fl - control
2m	-0.000525	-0.008417 to 0.007367	No	ns	0.9971			2m	0.001	-0.007271 to 0.009271	No	ns	0.984
6m	0.0035	-0.003559 to 0.01056	No	ns	0.4778			6m	0.008333	0.001580 to 0.01509	Yes	*	0.0144
12m	0.0112	0.004756 to 0.01764	Yes	**	0.0013			12m	0.01043	0.004176 to 0.01668	Yes	**	0.0014
5J
Sidak's multiple comparisons test	Predicted (LS) mean diff.	95.00% CI of diff.	Significant?	Summary	Adjusted P Value			Sidak's multiple comparisons test	Predicted (LS) mean diff.	95.00% CI of diff.	Significant?	Summary	Adjusted P Value
male								female
Lepr-cre; itga11fl/fl - control								Lepr-cre; itga11fl/fl - control
2m	0.001425	-0.06438 to 0.06723	No	ns	0.9999			2m	2.5e-05	-0.07803 to 0.07808	No	ns	>0.9999
6m	-0.06978	-0.1286 to -0.01092	Yes	*	0.0195			6m	-0.06963	-0.1334 to -0.005905	Yes	*	0.0307
12m	-0.01937	-0.07310 to 0.03436	No	ns	0.7095			12m	0.003486	-0.05552 to 0.06249	No	ns	0.9981
5K
Sidak's multiple comparisons test	Predicted (LS) mean diff.	95.00% CI of diff.	Significant?	Summary	Adjusted P Value			Sidak's multiple comparisons test	Predicted (LS) mean diff.	95.00% CI of diff.	Significant?	Summary	Adjusted P Value
male								female	(log2-transformed)
Lepr-cre; itga11fl/fl - control								Lepr-cre; itga11fl/fl - control
2m	-168.3	-333.9 to -2.688	Yes	*	0.0461			2m	0.1805	-1.512 to 1.873	No	ns	0.9889
6m	244.9	96.75 to 393.0	Yes	**	0.0019			6m	1.611	0.2293 to 2.993	Yes	*	0.0208
12m	25.59	-109.6 to 160.8	No	ns	0.9405			12m	0.9038	-0.3757 to 2.183	No	ns	0.212
5L
Sidak's multiple comparisons test	Predicted (LS) mean diff.	95.00% CI of diff.	Significant?	Summary	Adjusted P Value			Sidak's multiple comparisons test	Predicted (LS) mean diff.	95.00% CI of diff.	Significant?	Summary	Adjusted P Value
male								female
Lepr-cre; itga11fl/fl - control								Lepr-cre; itga11fl/fl - control
2m	-15.51	-48.95 to 17.93	No	ns	0.5311			2m	-0.5457	-34.15 to 33.06	No	ns	>0.9999
6m	10.97	-18.95 to 40.88	No	ns	0.699			6m	29.26	1.816 to 56.69	Yes	*	0.0353
12m	21.57	-5.733 to 48.88	No	ns	0.1403			12m	57.21	31.81 to 82.61	Yes	***	<0.0001
5M
Sidak's multiple comparisons test	Predicted (LS) mean diff.	95.00% CI of diff.	Significant?	Summary	Adjusted P Value			Sidak's multiple comparisons test	Predicted (LS) mean diff.	95.00% CI of diff.	Significant?	Summary	Adjusted P Value
male								female
Lepr-cre; itga11fl/fl - control								Lepr-cre; itga11fl/fl - control
6m	0.29	0.1493 to 0.4307	Yes	**	0.004			6m	0.2667	0.1414 to 0.3919	Yes	**	0.0035
12m	0.22	0.07930 to 0.3607	Yes	*	0.011			12m	0.3833	0.2581 to 0.5086	Yes	***	0.0009
Figure 5N: Statistical comparison using two-way ANOVA followed by Sidak's test
Sidak's multiple comparisons test	Mean Diff.	95.00% CI of diff.	Significant?	Summary	Adjusted P Value
Control vs KO
6m	-0.6824	-7.836 to 6.471	No	ns	0.9579
12m	0.424	-7.574 to 8.422	No	ns	0.9867
5O
Sidak's multiple comparisons test	Predicted (LS) mean diff.	95.00% CI of diff.	Significant?	Summary	Adjusted P Value
Lepr-cre; itga11fl/fl - control
6m	3.627	2.384 to 4.870	Yes	***	<0.0001
12m	4.26	3.017 to 5.503	Yes	***	<0.0001
