# Supplementary material for: Integrin alpha11 is an Osteolectin receptor and is required for the maintenance of adult skeletal bone mass
Source: eLife. 2019 Jan 11;8:e42274. doi: 10.7554/eLife.42274 (PMC6349404; doi:10.7554/eLife.42274)
Supplement: Figure 6—source data 1. [file elife-42274-fig6-data1.xlsx]

## Sheet: Figure 6
Figure 6 (Statistical significance assessed using two-way repeated measures ANOVA followed by the Sidak's multiple comparisons test)
Figure 6B	Control males			Lepr-cre; itga11fl/fl males			Control females			Lepr-cre; itga11fl/fl females
Total area (mm2)	2m	6m	12m	2m	6m	12m	2m	6m	12m	2m	6m	12m
	1.77388	1.81842	2.35094	1.68863	2.04718	2.51459	1.52438	1.63228	1.85544	1.68652	1.46983	1.83033
	1.73631	1.99983	1.71857	1.74832	1.64399	1.91381	1.70387	1.46842	1.84088	1.52768	1.77306	1.97252
	1.84573	2.05212	1.71491	1.79416	1.53383	1.83634	1.56659	1.88878	1.78857	1.58882	1.86259	1.76776
	1.80394	1.65345	1.87439	2.1794	1.61006	1.82115	1.13082	1.57205	1.90393	1.28046	1.74936	1.94384
		1.8813	2.36204		1.80246	1.87931		1.67844	2.0007		1.34665	1.85356
			1.83392			2.2027		1.8276	1.99518		1.61899	1.97362
									1.76776			1.85356
Figure 6C	Control males			Lepr-cre; itga11fl/fl males			Control females			Lepr-cre; itga11fl/fl females
Cortical area (mm2)	2m	6m	12m	2m	6m	12m	2m	6m	12m	2m	6m	12m
	0.73856	0.97889	0.95327	0.69736	1.03107	0.88877	0.6185	0.78669	0.50532	0.65489	0.78221	0.74313
	0.72685	1.06198	0.78138	0.72705	0.9034	0.71175	0.63387	0.74712	0.80869	0.59891	0.90497	0.78857
	0.74979	0.98734	0.82322	0.76312	0.81518	0.72609	0.63389	0.90763	0.79842	0.62113	0.89157	0.76234
	0.75576	0.94628	0.85067	0.93064	0.88129	0.81953	0.47175	0.77279	0.76677	0.51417	0.90858	0.75665
		0.96522	0.87825		0.98329	0.71888		0.86929	0.79098		0.70647	0.73576
			0.74724			0.93596		0.86302	0.80314		0.85191	0.79782
									0.76234			0.73576
Figure 6D	Control males			Lepr-cre; itga11fl/fl males			Control females			Lepr-cre; itga11fl/fl females
Cortical thickness (mm)	2m	6m	12m	2m	6m	12m	2m	6m	12m	2m	6m	12m
	0.153	0.211	0.181	0.15	0.21	0.162	0.142	0.186	0.174	0.138	0.197	0.163
	0.152	0.216	0.173	0.158	0.211	0.148	0.131	0.19	0.176	0.137	0.199	0.163
	0.151	0.201	0.182	0.161	0.197	0.155	0.142	0.195	0.178	0.134	0.19	0.17
	0.151	0.226	0.178	0.173	0.202	0.176	0.134	0.188	0.164	0.135	0.205	0.158
		0.207	0.165		0.217	0.151		0.203	0.163		0.187	0.158
			0.158			0.177		0.187	0.164		0.201	0.166
									0.17			0.158
Figure 6E	Control males			Lepr-cre; itga11fl/fl males			Control females			Lepr-cre; itga11fl/fl females
Cortical area/total area (%)	2m	6m	12m	2m	6m	12m	2m	6m	12m	2m	6m	12m
	41.636	53.832	40.549	41.298	50.365	35.345	40.574	48.196	43.403	38.831	53.218	40.601
	41.862	53.104	45.467	41.585	54.952	37.19	37.202	40.879	43.929	39.204	51.04	39.978
	40.623	48.113	48.004	42.533	53.147	39.54	40.463	48.054	44.64	39.094	47.867	43.125
	41.895	57.231	45.384	42.702	54.737	45.001	41.717	49.158	40.273	40.155	51.938	38.926
		51.306	37.182		54.553	38.252		51.791	39.535		52.461	39.695
			40.746			42.492		52.62	40.254		47.221	40.424
									43.125			39.695
Figure 6F	Control males			Lepr-cre; itga11fl/fl males			Control females			Lepr-cre; itga11fl/fl females
Cortical BMD (mg HA/ccm)	2m	6m	12m	2m	6m	12m	2m	6m	12m	2m	6m	12m
	1120.73	1252.68	1263.39	1118.88	1257.7	1228.4	1113.19	1257.24	1269.74	1103.73	1278.4	1261.6
	1111.87	1256.78	1264.98	1116.96	1259.95	1237.2	1093.88	1247.32	1268.42	1109.42	1250.69	1259.03
	1110.94	1249.9	1261.21	1138.92	1252.08	1247.98	1131.58	1262.86	1277.74	1130.06	1259.09	1262.99
	1119.08	1268.22	1255.85	1133.56	1240.77	1241.88	1139.98	1268.55	1268.68	1146.26	1266.43	1257.37
		1249.37	1253.73		1269.41	1229.46		1272.91	1268.62		1261.01	1247.72
			1251.75			1231.58		1251.42	1262		1263.06	1251.68
									1262.99			1247.72
Figure 6G
Cortical MAR (mm/day)	Control females				Lepr-cre; itga11fl/fl females
6m	0.92	0.88	0.86		0.84	0.81	0.81
12m	0.82	0.85	0.82		0.65	0.64	0.66
	Control males				Lepr-cre; itga11fl/fl males
6m	0.63	0.63	0.67	0.65	0.6	0.61	0.62	0.61
12m	0.52	0.57	0.48		0.32	0.34	0.31

## Sheet: Figure 6 Statistics
Figure 6 (Statistical significance assessed using two-way repeated measures ANOVA followed by the Sidak's multiple comparisons test)
6B
Sidak's multiple comparisons test	Predicted (LS) mean diff.	95.00% CI of diff.	Significant?	Summary	Adjusted P Value			Sidak's multiple comparisons test	Predicted (LS) mean diff.	95.00% CI of diff.	Significant?	Summary	Adjusted P Value
male								female
Lepr-cre; itga11fl/fl - control								Lepr-cre; itga11fl/fl - control
2m	-0.06266	-0.4438 to 0.3184	No	ns	0.9596			2m	-0.03945	-0.2735 to 0.1946	No	ns	0.9589
6m	0.1535	-0.1873 to 0.4944	No	ns	0.5539			6m	0.04118	-0.1499 to 0.2323	No	ns	0.9197
12m	-0.05219	-0.3633 to 0.2590	No	ns	0.9573			12m	-0.006104	-0.1830 to 0.1708	No	ns	0.9996
6C
Sidak's multiple comparisons test	Predicted (LS) mean diff.	95.00% CI of diff.	Significant?	Summary	Adjusted P Value			Sidak's multiple comparisons test	Predicted (LS) mean diff.	95.00% CI of diff.	Significant?	Summary	Adjusted P Value
male								female
Lepr-cre; itga11fl/fl - control								Lepr-cre; itga11fl/fl - control
2m	-0.0368	-0.1860 to 0.1124	No	ns	0.8805			2m	-0.007772	-0.1403 to 0.1248	No	ns	0.9981
6m	0.0651	-0.06838 to 0.1986	No	ns	0.4911			6m	-0.01653	-0.1247 to 0.09168	No	ns	0.9688
12m	0.03884	-0.08301 to 0.1607	No	ns	0.778			12m	-0.01205	-0.1122 to 0.08813	No	ns	0.9842
6D
Sidak's multiple comparisons test	Predicted (LS) mean diff.	95.00% CI of diff.	Significant?	Summary	Adjusted P Value			Sidak's multiple comparisons test	Predicted (LS) mean diff.	95.00% CI of diff.	Significant?	Summary	Adjusted P Value
male								female
Lepr-cre; itga11fl/fl - control								Lepr-cre; itga11fl/fl - control
2m	-0.00875	-0.02846 to 0.01096	No	ns	0.5652			2m	0.00125	-0.01070 to 0.01320	No	ns	0.9895
6m	0.0048	-0.01283 to 0.02243	No	ns	0.8471			6m	-0.005	-0.01476 to 0.004761	No	ns	0.4625
12m	0.01133	-0.004764 to 0.02743	No	ns	0.2082			12m	0.007571	-0.001465 to 0.01661	No	ns	0.114
6E
Sidak's multiple comparisons test	Predicted (LS) mean diff.	95.00% CI of diff.	Significant?	Summary	Adjusted P Value			Sidak's multiple comparisons test	Predicted (LS) mean diff.	95.00% CI of diff.	Significant?	Summary	Adjusted P Value
male								female
Lepr-cre; itga11fl/fl - control								Lepr-cre; itga11fl/fl - control
2m	-0.5255	-5.671 to 4.620	No	ns	0.9896			2m	0.668	-3.959 to 5.295	No	ns	0.9734
6m	-0.8336	-5.436 to 3.768	No	ns	0.9472			6m	-2.175	-5.952 to 1.603	No	ns	0.3666
12m	3.252	-0.9490 to 7.453	No	ns	0.1512			12m	1.816	-1.681 to 5.314	No	ns	0.4511
6F
Sidak's multiple comparisons test	Predicted (LS) mean diff.	95.00% CI of diff.	Significant?	Summary	Adjusted P Value			Sidak's multiple comparisons test	Predicted (LS) mean diff.	95.00% CI of diff.	Significant?	Summary	Adjusted P Value
male								female
Lepr-cre; itga11fl/fl - control								Lepr-cre; itga11fl/fl - control
2m	-11.43	-29.50 to 6.653	No	ns	0.2842			2m	-2.712	-15.04 to 9.616	No	ns	0.9152
6m	-0.5952	-16.76 to 15.57	No	ns	0.9995			6m	-3.064	-13.13 to 7.001	No	ns	0.8082
12m	22.4	7.640 to 37.16	Yes	**	0.0037			12m	12.87	3.550 to 22.19	Yes	**	0.0066
6G
Sidak's multiple comparisons test	Predicted (LS) mean diff.	95.00% CI of diff.	Significant?	Summary	Adjusted P Value			Sidak's multiple comparisons test	Predicted (LS) mean diff.	95.00% CI of diff.	Significant?	Summary	Adjusted P Value
male								female
Lepr-cre; itga11fl/fl - control								Lepr-cre; itga11fl/fl - control
6m	0.035	0.001198 to 0.06880	Yes	*	0.0442			6m	0.06667	0.02325 to 0.1101	Yes	*	0.0118
12m	0.2	0.1610 to 0.2390	Yes	***	<0.0001			12m	0.18	0.1366 to 0.2234	Yes	***	0.0003
