# Supplementary material for: Integrin alpha11 is an Osteolectin receptor and is required for the maintenance of adult skeletal bone mass
Source: eLife. 2019 Jan 11;8:e42274. doi: 10.7554/eLife.42274 (PMC6349404; doi:10.7554/eLife.42274)
Supplement: Figure 7—figure supplement 1—source data 1. [file elife-42274-fig7-figsupp1-data1.xlsx]

## Sheet: Figure 7-figure supplement 1
Figure 7-figure supplement 1A (Statistical significance assessed per gene using two-way repeated measures ANOVA followed by the Tukey's multiple comparisons test)	ALP (wt)	ALP (KO)	ALP (wt + rOln)	ALP (KO + rOln)	Axin2 (wt)	Axin2 (KO)	Axin2 (wt + rOln)	Axin2 (KO + rOln)	Lef1 (wt)	Lef1 (KO)	Lef1 (wt + rOln)	Lef1 (KO + rOln)	Runx2 (wt)	Runx2 (KO)	Runx2 (wt + rOln)	Runx2 (KO + rOln)
Relative expression	5.2401	0.809215	10.7376	0.916747	3.83509	1.24769	8.27789	1.6985	8.1098	1.16446	29.0339	0.784403	5.16162	1.02656	24.9821	0.708493
	3.66699	0.829087	14.2669	1.01368	2.34447	0.985729	13.7777	1.85223	6.7724	1.04222	41.2027	0.652779	4.8663	1.25948	37.0866	0.756716
	4.6738	0.327507	10.8498	1.63535	2.35261	0.441126	8.78025	1.09373	5.69489	0.429184	26.1668	1.28313	4.31041	0.513282	23.8816	2.54528
	3.27069	0.349798	15.0282	1.48411	3.99796	0.907055	8.93373	1.75232	8.02592	0.568277	46.8399	1.14843	3.51329	0.509737	29.8121	1.96268
	3.80948	2.68439	12.725	1.99252	2.8172	1.4184	8.10753	1.09373	7.03557	1.79585	30.4774	1.13655	3.87132	1.69094	37.8658	1.00196
Figure 7-figure supplement 1B (Statistical significance assessed per gene using two-way repeated measures ANOVA followed by the Dunnett's multiple comparisons test)	ALP (wt)	ALP (wt + rOln)	ALP (KO + rOln)	Axin2 (wt)	Axin2 (wt + rOln)	Axin2 (KO + rOln)	Lef1 (wt)	Lef1 (wt + rOln)	Lef1 (KO + rOln)	Runx2 (wt)	ALP (wt + rOln)	ALP (KO + rOln)
Relative expression	1.34457	2.9427	0.408141	0.307839	4.65974	0.615679	1.31749	3.31219	1.13115	0.9169	2.6847	1.0753
	0.597554	1.42123	0.751133	1.58036	2.54956	1.26598	1.03368	4.91703	1.36395	0.5266	1.6186	0.8037
	1.25452	2.59753	2.309	0.966103	1.26598	1.919	0.589591	1.61081	0.773	1.2877	4.1837	0.6997
	0.799484	2.26128	0.805	1.19769	1.46434	0.297	0.869216	1.90236	0.925	1.2699	2.8774	0.7045

## Sheet: Figure 7-figure s1 Statistics
Figure 7-figure supplement 1A (Statistical significance assessed using log2 one-way repeated measures ANOVA followed by the Sidak's multiple comparisons test)
Alp								Axin2								Lef1								Runx2
Sidak's multiple comparisons test	Mean Diff.	95.00% CI of diff.	Significant?	Summary	Adjusted P Value			Sidak's multiple comparisons test	Mean Diff.	95.00% CI of diff.	Significant?	Summary	Adjusted P Value			Sidak's multiple comparisons test	Mean Diff.	95.00% CI of diff.	Significant?	Summary	Adjusted P Value			Sidak's multiple comparisons test	Mean Diff.	95.00% CI of diff.	Significant?	Summary	Adjusted P Value
1 vs. 2	2.481	0.2432 to 4.719	Yes	*	0.0355			1 vs. 2	1.683	0.6344 to 2.732	Yes	**	0.0096			1 vs. 2	3.004	1.640 to 4.368	Yes	**	0.0029			1 vs. 2	2.266	0.9690 to 3.563	Yes	**	0.007
1 vs. 3	-1.63	-2.499 to -0.7612	Yes	**	0.0053			1 vs. 3	-1.65	-2.703 to -0.5968	Yes	*	0.0105			1 vs. 3	-2.261	-2.819 to -1.703	Yes	***	0.0003			1 vs. 3	-2.81	-3.559 to -2.061	Yes	***	0.0004
2 vs. 4	-0.889	-3.062 to 1.284	No	ns	0.453			2 vs. 4	-0.648	-1.792 to 0.4961	No	ns	0.245			2 vs. 4	-0.138	-2.038 to 1.762	No	ns	0.9906			2 vs. 4	-0.446	-3.165 to 2.273	No	ns	0.9108
Figure 7-figure supplement 1B (Statistical significance assessed using log2 one-way repeated measures ANOVA followed by the Dunnett's multiple comparisons test)
Alp								Axin2								Lef1								Runx2
Dunnett's multiple comparisons test	Mean Diff.	95.00% CI of diff.	Significant?	Summary	Adjusted P Value			Dunnett's multiple comparisons test	Mean Diff.	95.00% CI of diff.	Significant?	Summary	Adjusted P Value			Dunnett's multiple comparisons test	Mean Diff.	95.00% CI of diff.	Significant?	Summary	Adjusted P Value			Dunnett's multiple comparisons test	Mean Diff.	95.00% CI of diff.	Significant?	Summary	Adjusted P Value
1 vs. 2	-1.232	-1.612 to -0.8529	Yes	**	0.0018			1 vs. 2	-1.322	-4.686 to 2.041	No	ns	0.3466			1 vs. 2	-1.54	-2.490 to -0.5900	Yes	*	0.0135			1 vs. 2	-1.512	-1.957 to -1.068	Yes	**	0.0016
1 vs. 3	0.125	-2.045 to 2.295	No	ns	0.9648			1 vs. 3	0.0854	-2.672 to 2.842	No	ns	0.9896			1 vs. 3	-0.1651	-0.7344 to 0.4041	No	ns	0.5078			1 vs. 3	0.2225	-1.243 to 1.688	No	ns	0.797
