# Supplementary material for: Integrin alpha11 is an Osteolectin receptor and is required for the maintenance of adult skeletal bone mass
Source: eLife. 2019 Jan 11;8:e42274. doi: 10.7554/eLife.42274 (PMC6349404; doi:10.7554/eLife.42274)
Supplement: Figure 7—source data 1. [file elife-42274-fig7-data1.xlsx]

## Sheet: Figure 7
Figure 7A (Statistical significance assessed using the Wilcoxon test followed by the Holm-Sidak multiple comparisons adjustment)
CFU-F/5x105 cells	control								Lepr-Cre; itga11fl/fl
2m	22	19	22	22	25	21	22	21	21	20	20	19	21	18	20	19
6m	19	20	21	22	22	19	24	20	21	20	19	20	21	17	20	22
Figure 7B (Statistical significance assessed using the Wilcoxon test followed by the Holm-Sidak multiple comparisons adjustment)
CFU-F cells/colony	control						Lepr-Cre; itga11fl/fl
2m	480	559	532	539	509	584	531	482	482	532	521	518
6m	515	520	521	528	491	478	561	427	417	405	506	482
Figure 7C (Statistical significance assessed using the paired t test)	control	Lepr-Cre; itga11fl/fl
OD562	0.769	0.36
	0.519	0.491
	0.831	0.427
	1.021	0.46
	0.846	0.376
	0.921	0.429
	0.716	0.51
Figure 7D (Statistical significance assessed using the paired t test)	control	Lepr-Cre; itga11fl/fl
OD500	0.052	0.053
	0.043	0.047
	0.047	0.042
	0.051	0.044
	0.042	0.04
	0.037	0.041
Figure 7E (Statistical significance assessed using the paired t test)	control	Lepr-Cre; itga11fl/fl
pellets that contain chondrocytes (%)	80	80
	90	90
	100	90
	90	100
	80	90
Figure 7F (Statistical significance assessed using one-way repeated measures ANOVA followed by the Sidak's multiple comparisons test)	control + PBS	Lepr-Cre; itga11fl/fl + PBS	control + rOln	Lepr-Cre; itga11fl/fl + rOln
OD562	1.294	0.556	1.853	0.532
	1.087	0.447	1.75	0.644
	1.125	0.55	1.838	0.52
Figure 7G (Statistical significance assessed using one-way repeated measures ANOVA followed by the Sidak's multiple comparisons test)	control + PBS	Lepr-Cre; itga11fl/fl + PBS	control + rOln	Lepr-Cre; itga11fl/fl + rOln
Relative Dmp1 level	1.08145	0.569579	3.66285	0.462642
	0.9546	0.48062	3.1448	0.571557
	0.978042	0.366775	3.65018	0.313811
	1.11959	0.280869	2.14796	0.273188
	0.866318	0.485643	3.93938	0.535133
Figure 7I (Statistical significance assessed using one-way repeated measures ANOVA followed by the Tukey's multiple comparisons test)	control + PBS	control + rOln	Lepr-Cre; itga11fl/fl + rOln
Trabecular BV/TV (%)	4.73	15.61	7.18
	7.57	8.5	5.52
	4.84	10.36	7.3
	4.24	13.28	7.61
	5.79	14.4	6.98
Figure 7J (Statistical significance assessed using one-way repeated measures ANOVA followed by the Tukey's multiple comparisons test)	control + PBS	control + rOln	Lepr-Cre; itga11fl/fl + rOln
Trabecular number	4.651	6.9023	5.1829
	4.6941	5.7123	4.2865
	4.2428	6.1763	4.9361
	4.0306	6.9108	4.9688
	4.2036	7.1233	4.7191
Figure 7K (Statistical significance assessed using one-way repeated measures ANOVA followed by the Tukey's multiple comparisons test)	control + PBS	control + rOln	Lepr-Cre; itga11fl/fl + rOln
Trabecular thickness (mm)	0.0238	0.0321	0.0258
	0.028	0.0255	0.0264
	0.0261	0.0266	0.0267
	0.0255	0.0298	0.0264
	0.0239	0.0302	0.0272
Figure 7L (Statistical significance assessed using one-way repeated measures ANOVA followed by the Tukey's multiple comparisons test)	control + PBS	control + rOln	Lepr-Cre; itga11fl/fl + rOln
Trabecular spacing (mm)	0.2201	0.1556	0.1995
	0.2224	0.1796	0.2383
	0.2397	0.1697	0.2097
	0.2537	0.1524	0.2094
	0.2441	0.151	0.22
Figure 7M (Statistical significance assessed using one-way repeated measures ANOVA followed by the Tukey's multiple comparisons test)	control + PBS	control + rOln	Lepr-Cre; itga11fl/fl + rOln
Trabecular connectivity density (1/mm3)	396.642	874.438	562.673
	507.504	664.128	290.782
	222.243	962.477	416.207
	310.447	892.694	613.61
	374.366	1184.95	495.61
Figure 7N (Statistical significance assessed using one-way repeated measures ANOVA followed by the Tukey's multiple comparisons test)	control + PBS	control + rOln	Lepr-Cre; itga11fl/fl + rOln
Trabecular BMD (mg/HA ccm)	911.404	938.587	944.804
	931.709	923.243	924.632
	943.613	923.64	943.018
	912.925	934.023	929.923
	923.904	933.163	937.264
Figure 7O (Statistical significance assessed using one-way repeated measures ANOVA followed by the Sidak's multiple comparisons test)	control + DMSO	Lepr-Cre; itga11fl/fl + DMSO	control + AZD2858	Lepr-Cre; itga11fl/fl + AZD2858
OD562	0.918	0.483	1.843	1.754
	0.984	0.368	1.585	1.856
	1.047	0.475	1.614	1.639
	0.834	0.382	1.634	1.642
	0.825	0.376	1.574	1.63
	0.742	0.321	1.322	1.275

## Sheet: Figure 7 Statistics
Figure 7A (Statistical significance assessed using the Wilcoxon test followed by the Holm-Sidak multiple comparisons adjustment)
Sidak's multiple comparisons test	Mean Diff.	95.00% CI of diff.	Significant?	Summary	Adjusted P Value
Control vs KO
2m	-2	NA	Yes	*	0.0463
6m	-1.5	NA	No	ns	0.375
Figure 7B (Statistical significance assessed using the Wilcoxon test followed by the Holm-Sidak multiple comparisons adjustment)
Sidak's multiple comparisons test	Mean Diff.	95.00% CI of diff.	Significant?	Summary	Adjusted P Value
Control vs KO
2m	-28.5	NA	No	ns	0.6836
6m	-44.5	NA	No	ns	0.6836
Figure 7C (Statistical significance assessed using the paired t test)
Paired t test
P value	0.002
P value summary	**
Figure 7D (Statistical significance assessed using the paired t test)
Paired t test
P value	0.6772
P value summary	ns
Figure 7E (Statistical significance assessed using the paired t test)
Paired t test
P value	0.6213
P value summary	ns
Figure 7F (Statistical significance assessed using one-way repeated measures ANOVA followed by the Sidak's multiple comparisons test)
Sidak's multiple comparisons test	Mean Diff.	95.00% CI of diff.	Significant?	Summary	Adjusted P Value
control + PBS vs. KO + PBS	0.651	0.2918 to 1.01	Yes	*	0.0157	A-B
control + PBS vs. control + rOln	-0.645	-0.9889 to -0.3011	Yes	*	0.0147	A-C
control + rOln vs. KO + rOln	1.248	0.7087 to 1.788	Yes	**	0.0097	C-D
Figure 7G (Statistical significance assessed using log2 one-way repeated measures ANOVA followed by the Sidak's multiple comparisons test)
Sidak's multiple comparisons test	Mean Diff.	95.00% CI of diff.	Significant?	Summary	Adjusted P Value
control vs. LepR-Cre; Itga11fl/fl	1.232	0.3841 to 2.080	Yes	*	0.0138
control vs. control + rOln	-1.701	-2.517 to -0.8854	Yes	**	0.0036
control + rOln vs. KO+ rOln	2.968	2.289 to 3.647	Yes	***	0.0002
Figure 7I (Statistical significance assessed using one-way repeated measures ANOVA followed by the Tukey's multiple comparisons test)
Tukey's multiple comparisons test	Mean Diff.	95.00% CI of diff.	Significant?	Summary	Adjusted P Value
control +PBS vs. control + rOln	-6.996	-13.21 to -0.7798	Yes	*	0.0343	A-B
control + PBS vs. KO + rOln	-1.484	-4.867 to 1.899	No	ns	0.3582	A-C
control + rOln vs. KO + rOln	5.512	1.559 to 9.465	Yes	*	0.0167	B-C
Figure 7J (Statistical significance assessed using one-way repeated measures ANOVA followed by the Tukey's multiple comparisons test)
Tukey's multiple comparisons test	Mean Diff.	95.00% CI of diff.	Significant?	Summary	Adjusted P Value
control +PBS vs. control + rOln	-2.201	-3.448 to -0.9529	Yes	**	0.0072	A-B
control + PBS vs. KO + rOln	-0.4543	-1.269 to 0.36	No	ns	0.2303	A-C
control + rOln vs. KO + rOln	1.746	1.02 to 2.473	Yes	**	0.0023	B-C
Figure 7K (Statistical significance assessed using one-way repeated measures ANOVA followed by the Tukey's multiple comparisons test)
Tukey's multiple comparisons test	Mean Diff.	95.00% CI of diff.	Significant?	Summary	Adjusted P Value
control +PBS vs. control + rOln	-0.00338	-0.01035 to 0.003588	No	ns	0.302	A-B
control + PBS vs. KO + rOln	-0.00104	-0.003937 to 0.001857	No	ns	0.4758	A-C
control + rOln vs. KO + rOln	0.00234	-0.002286 to 0.006966	No	ns	0.2796	B-C
Figure 7L (Statistical significance assessed using one-way repeated measures ANOVA followed by the Tukey's multiple comparisons test)
Tukey's multiple comparisons test	Mean Diff.	95.00% CI of diff.	Significant?	Summary	Adjusted P Value
control +PBS vs. control + rOln	0.07434	0.03705 to 0.1116	Yes	**	0.0046	A-B
control + PBS vs. KO + rOln	0.02062	-0.01497 to 0.05621	No	ns	0.2127	A-C
control + rOln vs. KO + rOln	-0.05372	-0.07247 to -0.03497	Yes	**	0.0012	B-C
Figure 7M (Statistical significance assessed using one-way repeated measures ANOVA followed by the Tukey's multiple comparisons test)
Tukey's multiple comparisons test	Mean Diff.	95.00% CI of diff.	Significant?	Summary	Adjusted P Value
control +PBS vs. control + rOln	-553.5	-963.8 to -143.2	Yes	*	0.0187	A-B
control + PBS vs. KO + rOln	-113.5	-426.6 to 199.5	No	ns	0.4698	A-C
control + rOln vs. KO + rOln	440	163.6 to 716.3	Yes	*	0.0104	B-C
Figure 7N (Statistical significance assessed using one-way repeated measures ANOVA followed by the Tukey's multiple comparisons test)
Tukey's multiple comparisons test	Mean Diff.	95.00% CI of diff.	Significant?	Summary	Adjusted P Value
control +PBS vs. control + rOln	-5.82	-37.41 to 25.77	No	ns	0.799	A-B
control + PBS vs. KO + rOln	-11.22	-36.47 to 14.04	No	ns	0.3511	A-C
control + rOln vs. KO + rOln	-5.397	-19.29 to 8.5	No	ns	0.4294	B-C
Figure 7O (Statistical significance assessed using one-way repeated measures ANOVA followed by the Sidak's multiple comparisons test)
Sidak's multiple comparisons test	Mean Diff.	95.00% CI of diff.	Significant?	Summary	Adjusted P Value
control + DMSO vs. KO + DMSO	0.4908	0.3733 to 0.6084	Yes	***	<0.0001	A-B
control + DMSO vs. control + AZD2858	-0.7037	-0.9116 to -0.4957	Yes	***	0.0002	A-C
control + AZD2858 vs. KO + AZD2858	-0.03733	-0.2179 to 0.1432	No	ns	0.8747	C-D
