# Supplementary figures and images for: Integrin alpha11 is an Osteolectin receptor and is required for the maintenance of adult skeletal bone mass
Source: eLife journal article supplement (doi:10.7554/elife.42274), 2019-01-11

Figure 7-figure supplement 1

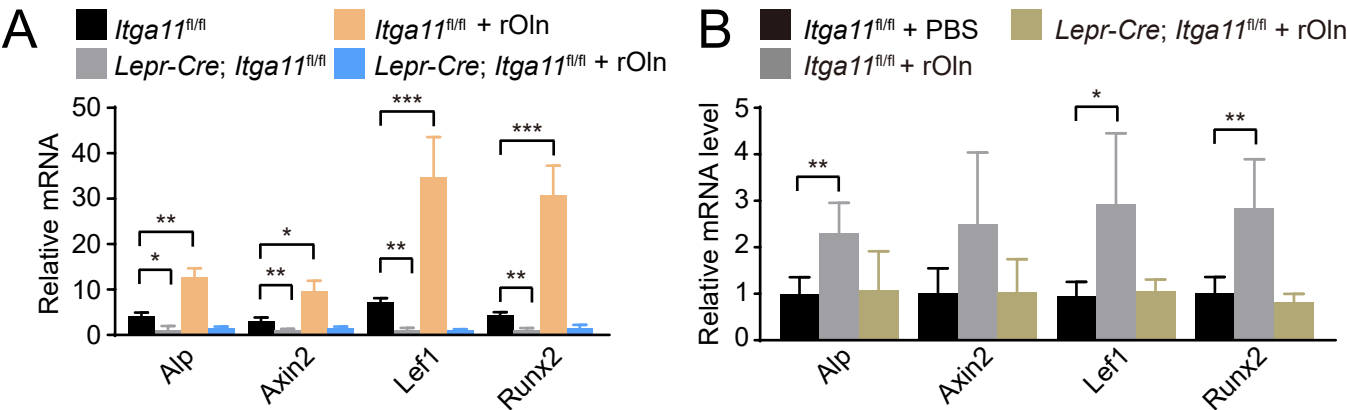

Supplement: supp [file elife-42274-supp-v1.zip]

Figure 5-figure supplement 1

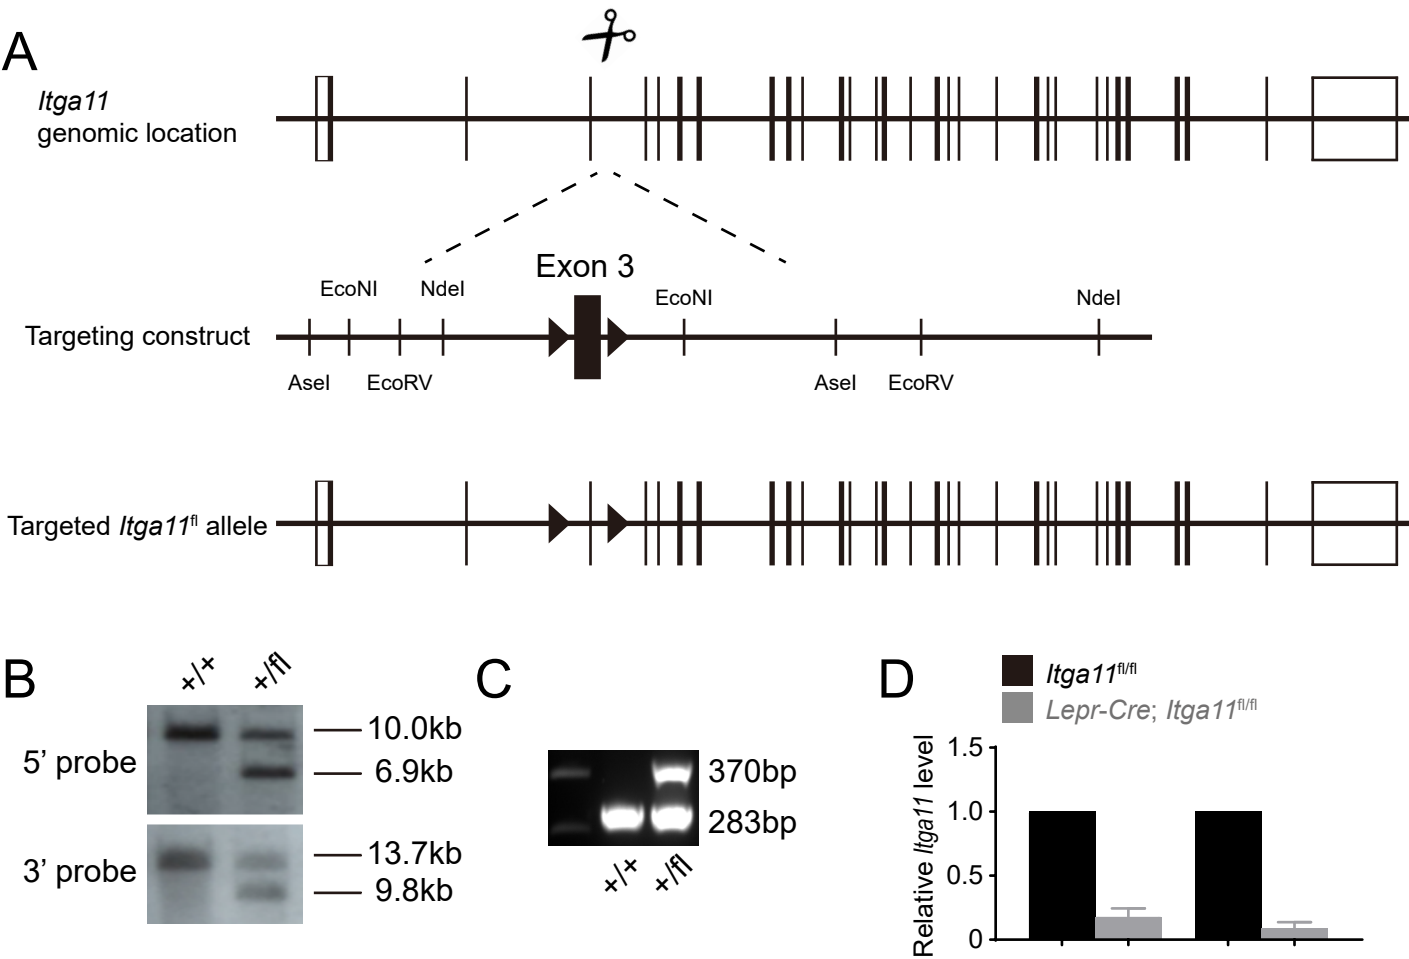

Supplement: supp [file elife-42274-supp-v1.zip]
